# Supplementary material
Source: Research Square preprint supplement (doi:10.21203/rs.3.rs-9428634/v1)
Supplement: Supplementary file 1 [file 25356b848e2355f6fdff7e33.docx]

**Supporting information**

Long-term Stability of Giant Electrocaloric Effect in Ferroelectric Polymer via High-entropy State Construction

**Wenning Qia, Ruilu Guob, Hui Quanc, Zhipeng Wanga, Dali Gaoc,*, Zheng Zhoua, Qifang Lia, Guang-Xin Chena,***

*a College of Material Science andEngineering, Beijing University of Chemical Technology, Beijing, 100029, P. R. China*

*b China Electric Power Research Institute, Beijing, 100192, P. R. China*

*c Sinopec Beijing Research Institute of Chemical Industry, Beijing, 100013, P. R. China*

**Corresponding Authors**

*E-mail: gaodl.bjhy@sinopec.com. (Dali Gao).

*E-mail: gxchen@mail.buct.edu.cn. (Guang-Xin Chen).

**Supplementary Note 1**

The absorptivity at 3022 cm-1 is derived from the asymmetric stretching vibration of the C-H bond. Since it is almost proportional to the thickness of the sample and does not depend on the state of the sample, the absorptivity of each sample can be normalized by dividing the thickness. To quantitatively analyze the contents of the different conformations, the estimated fractions of the four distinct conformations were derived as follows:

where Ai can be any of Atttt, Atttg, Atgtg′ and Atgtgtg, which are the absorbances at the peaks of 1286, 1246, 614, and 507 cm−1, corresponding to tttt, tttg, tgtg’, and tgtgtg.


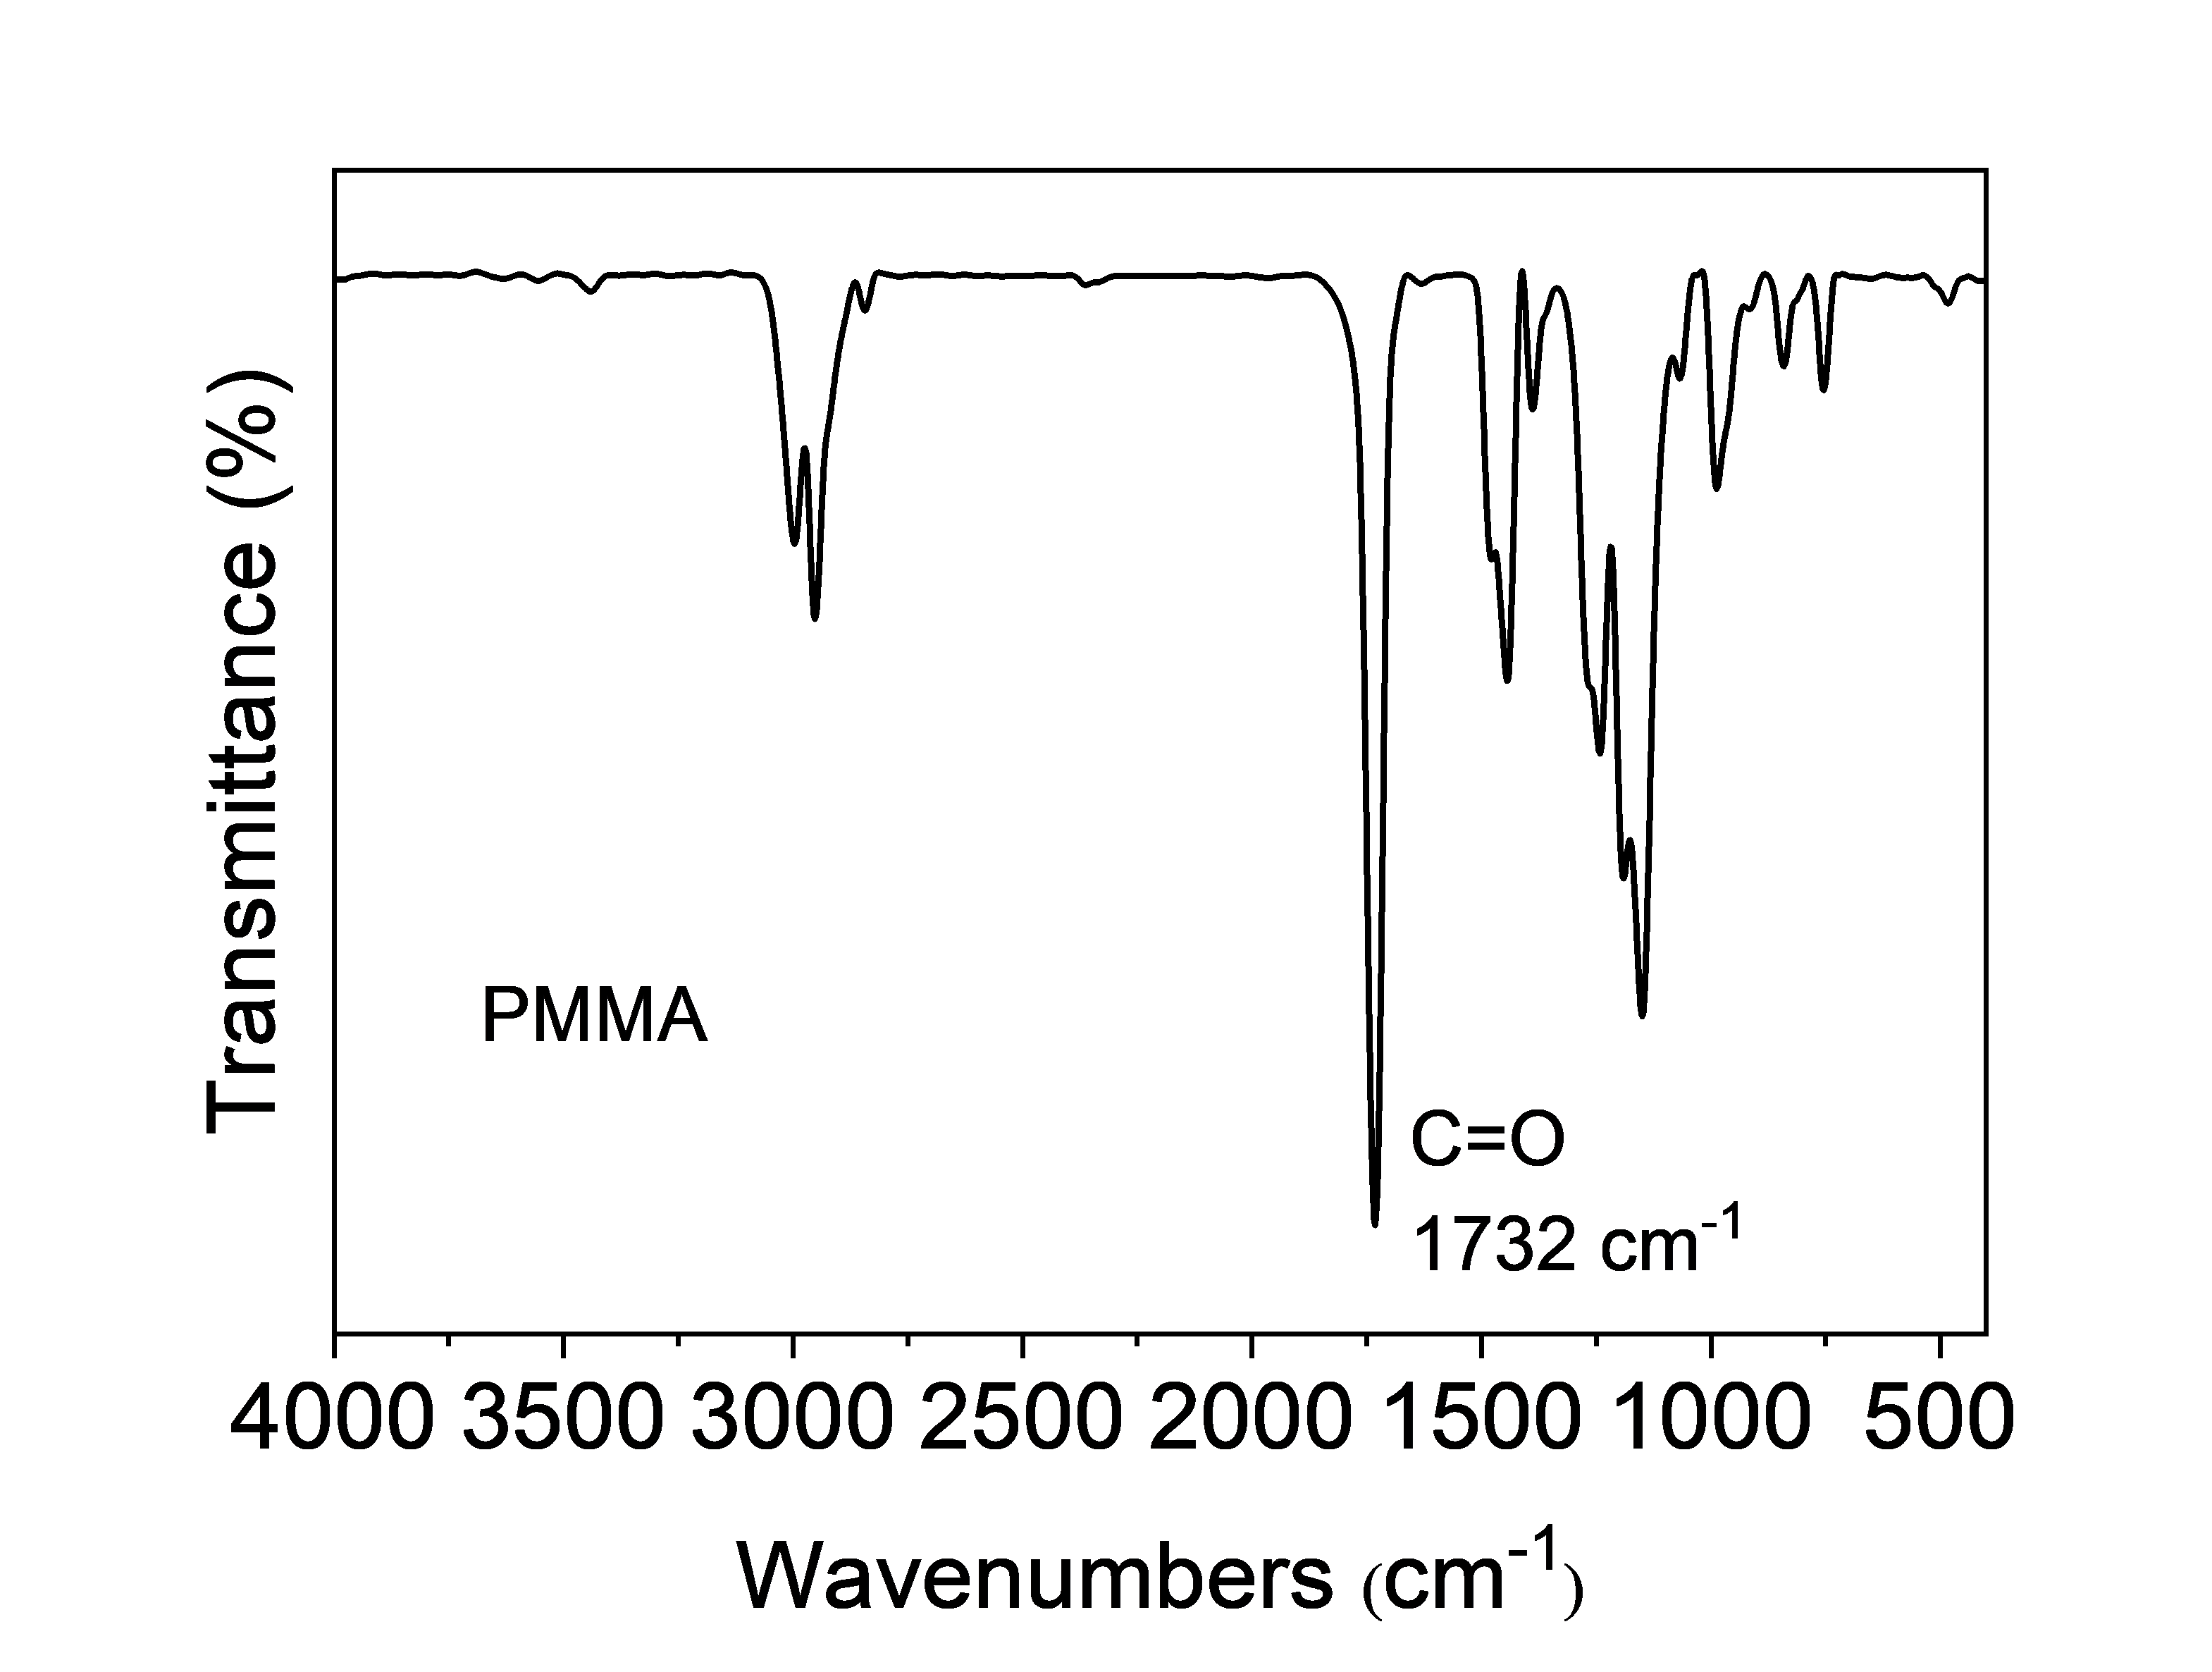


**Figure S1.** FT-IR spectra of PMMA.


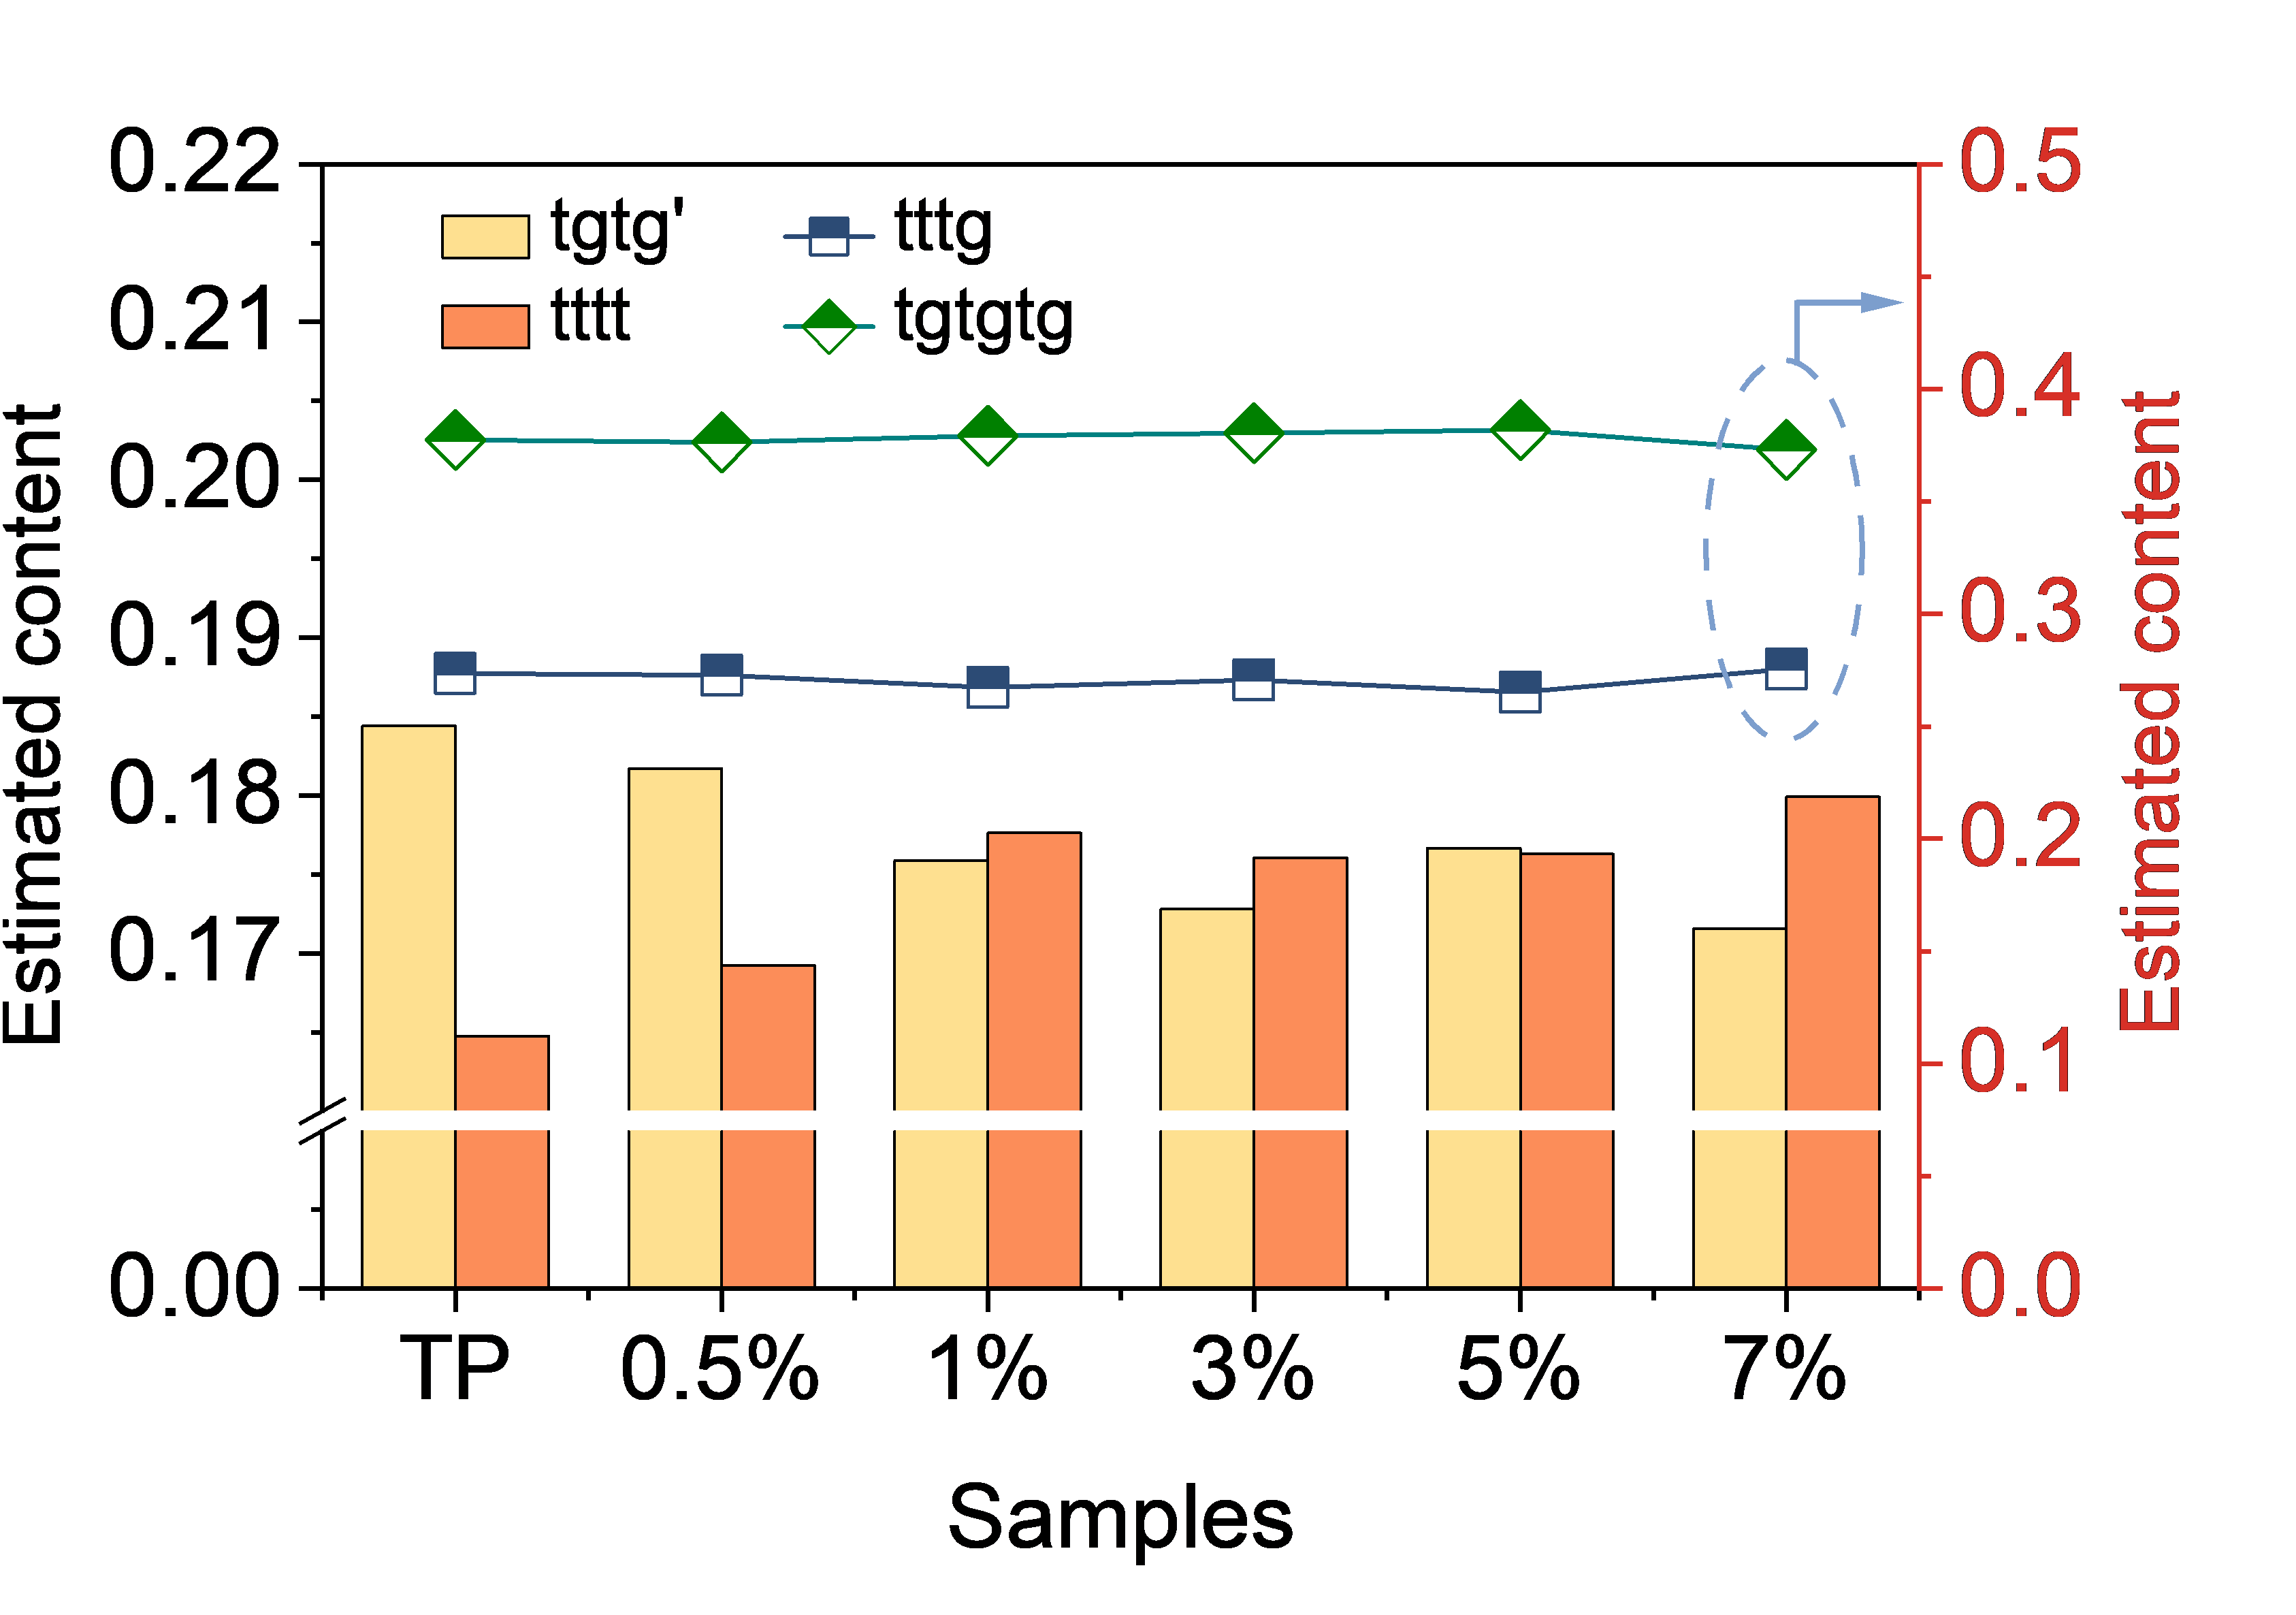


**Figure S2.** Fractions of four chain configurations.


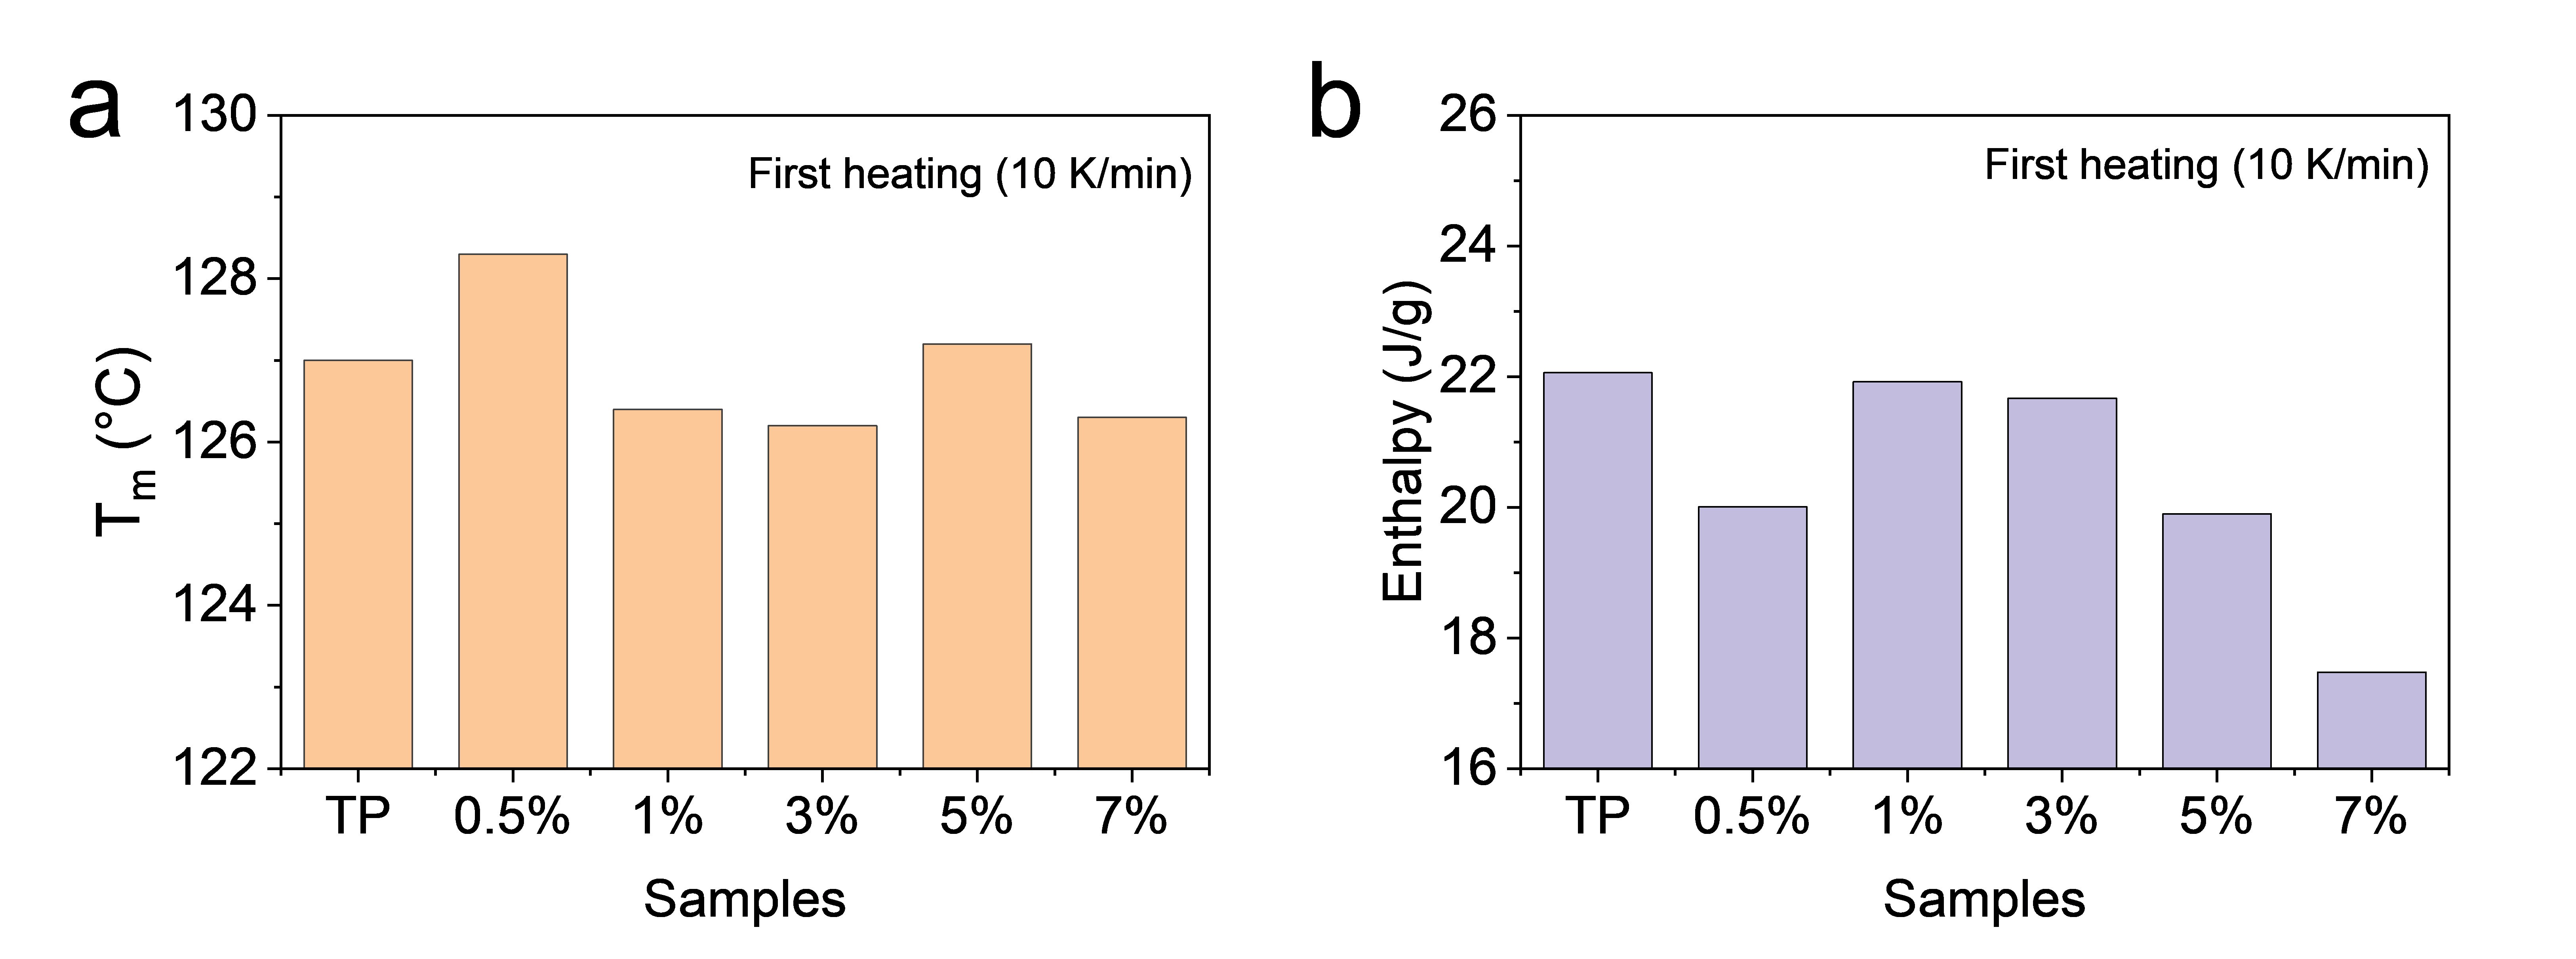


**Figure S3.** **a** The melting points and **b** the enthalpy changes of all films.

**Supplementary Note 2**

The calculation formula of crystallinity Δχc of films with different PMMA content is as follows：

where Δχc is the crystallinity, ΔHm is the melting enthalpy of PVDF, ΔH*m is the melting enthalpy of PVDF with 100% crystallinity (about 104.7 J/g), and mp is the mass fraction of PMMA.


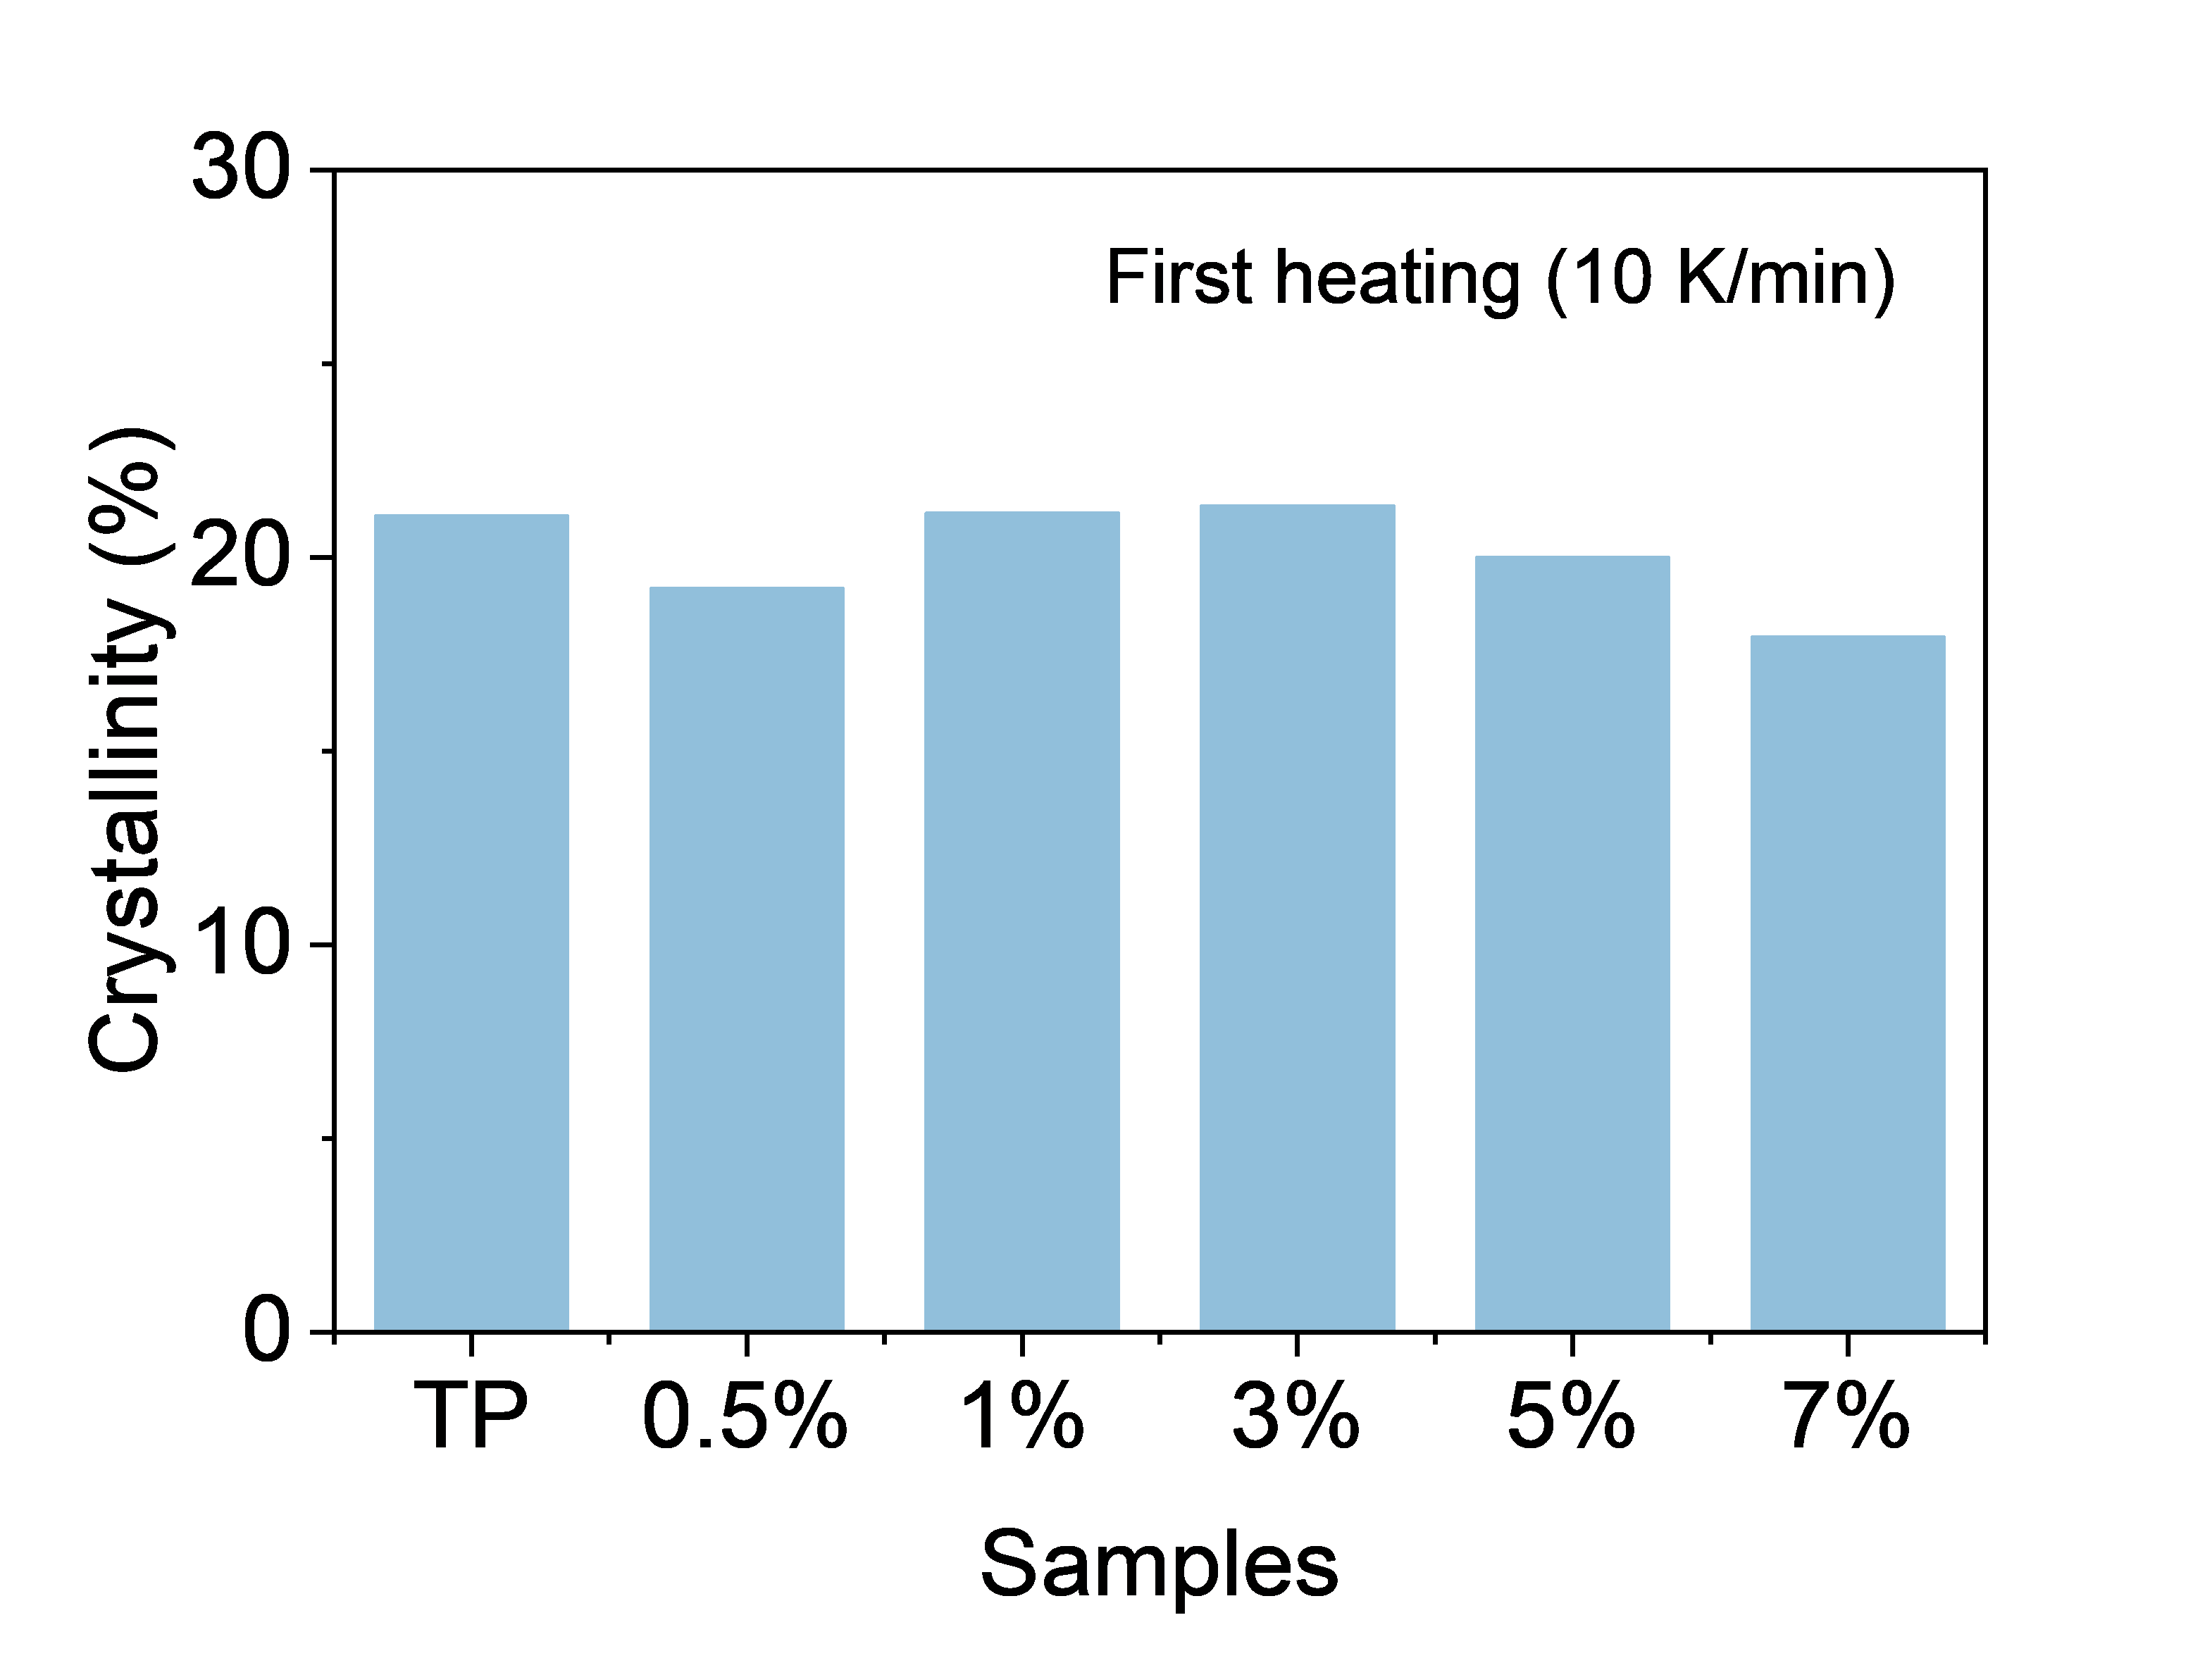


**Figure S4.** Crystallinity of all films.

**Supplementary Note3**

The crystallite size was estimated using Scherrer's formula：

where D denotes the crystal size, K is the Scherrer's constant, taken as K=0.89, λ is the X-ray wavelength, β is the full width at half maxima, θ is the Bragg angle.

The lattice spacing was estimated using Bragg’s law:

where n is the diffraction order, λ is the X-ray wavelength, θ is the diffraction angle, and d is the lattice spacing.


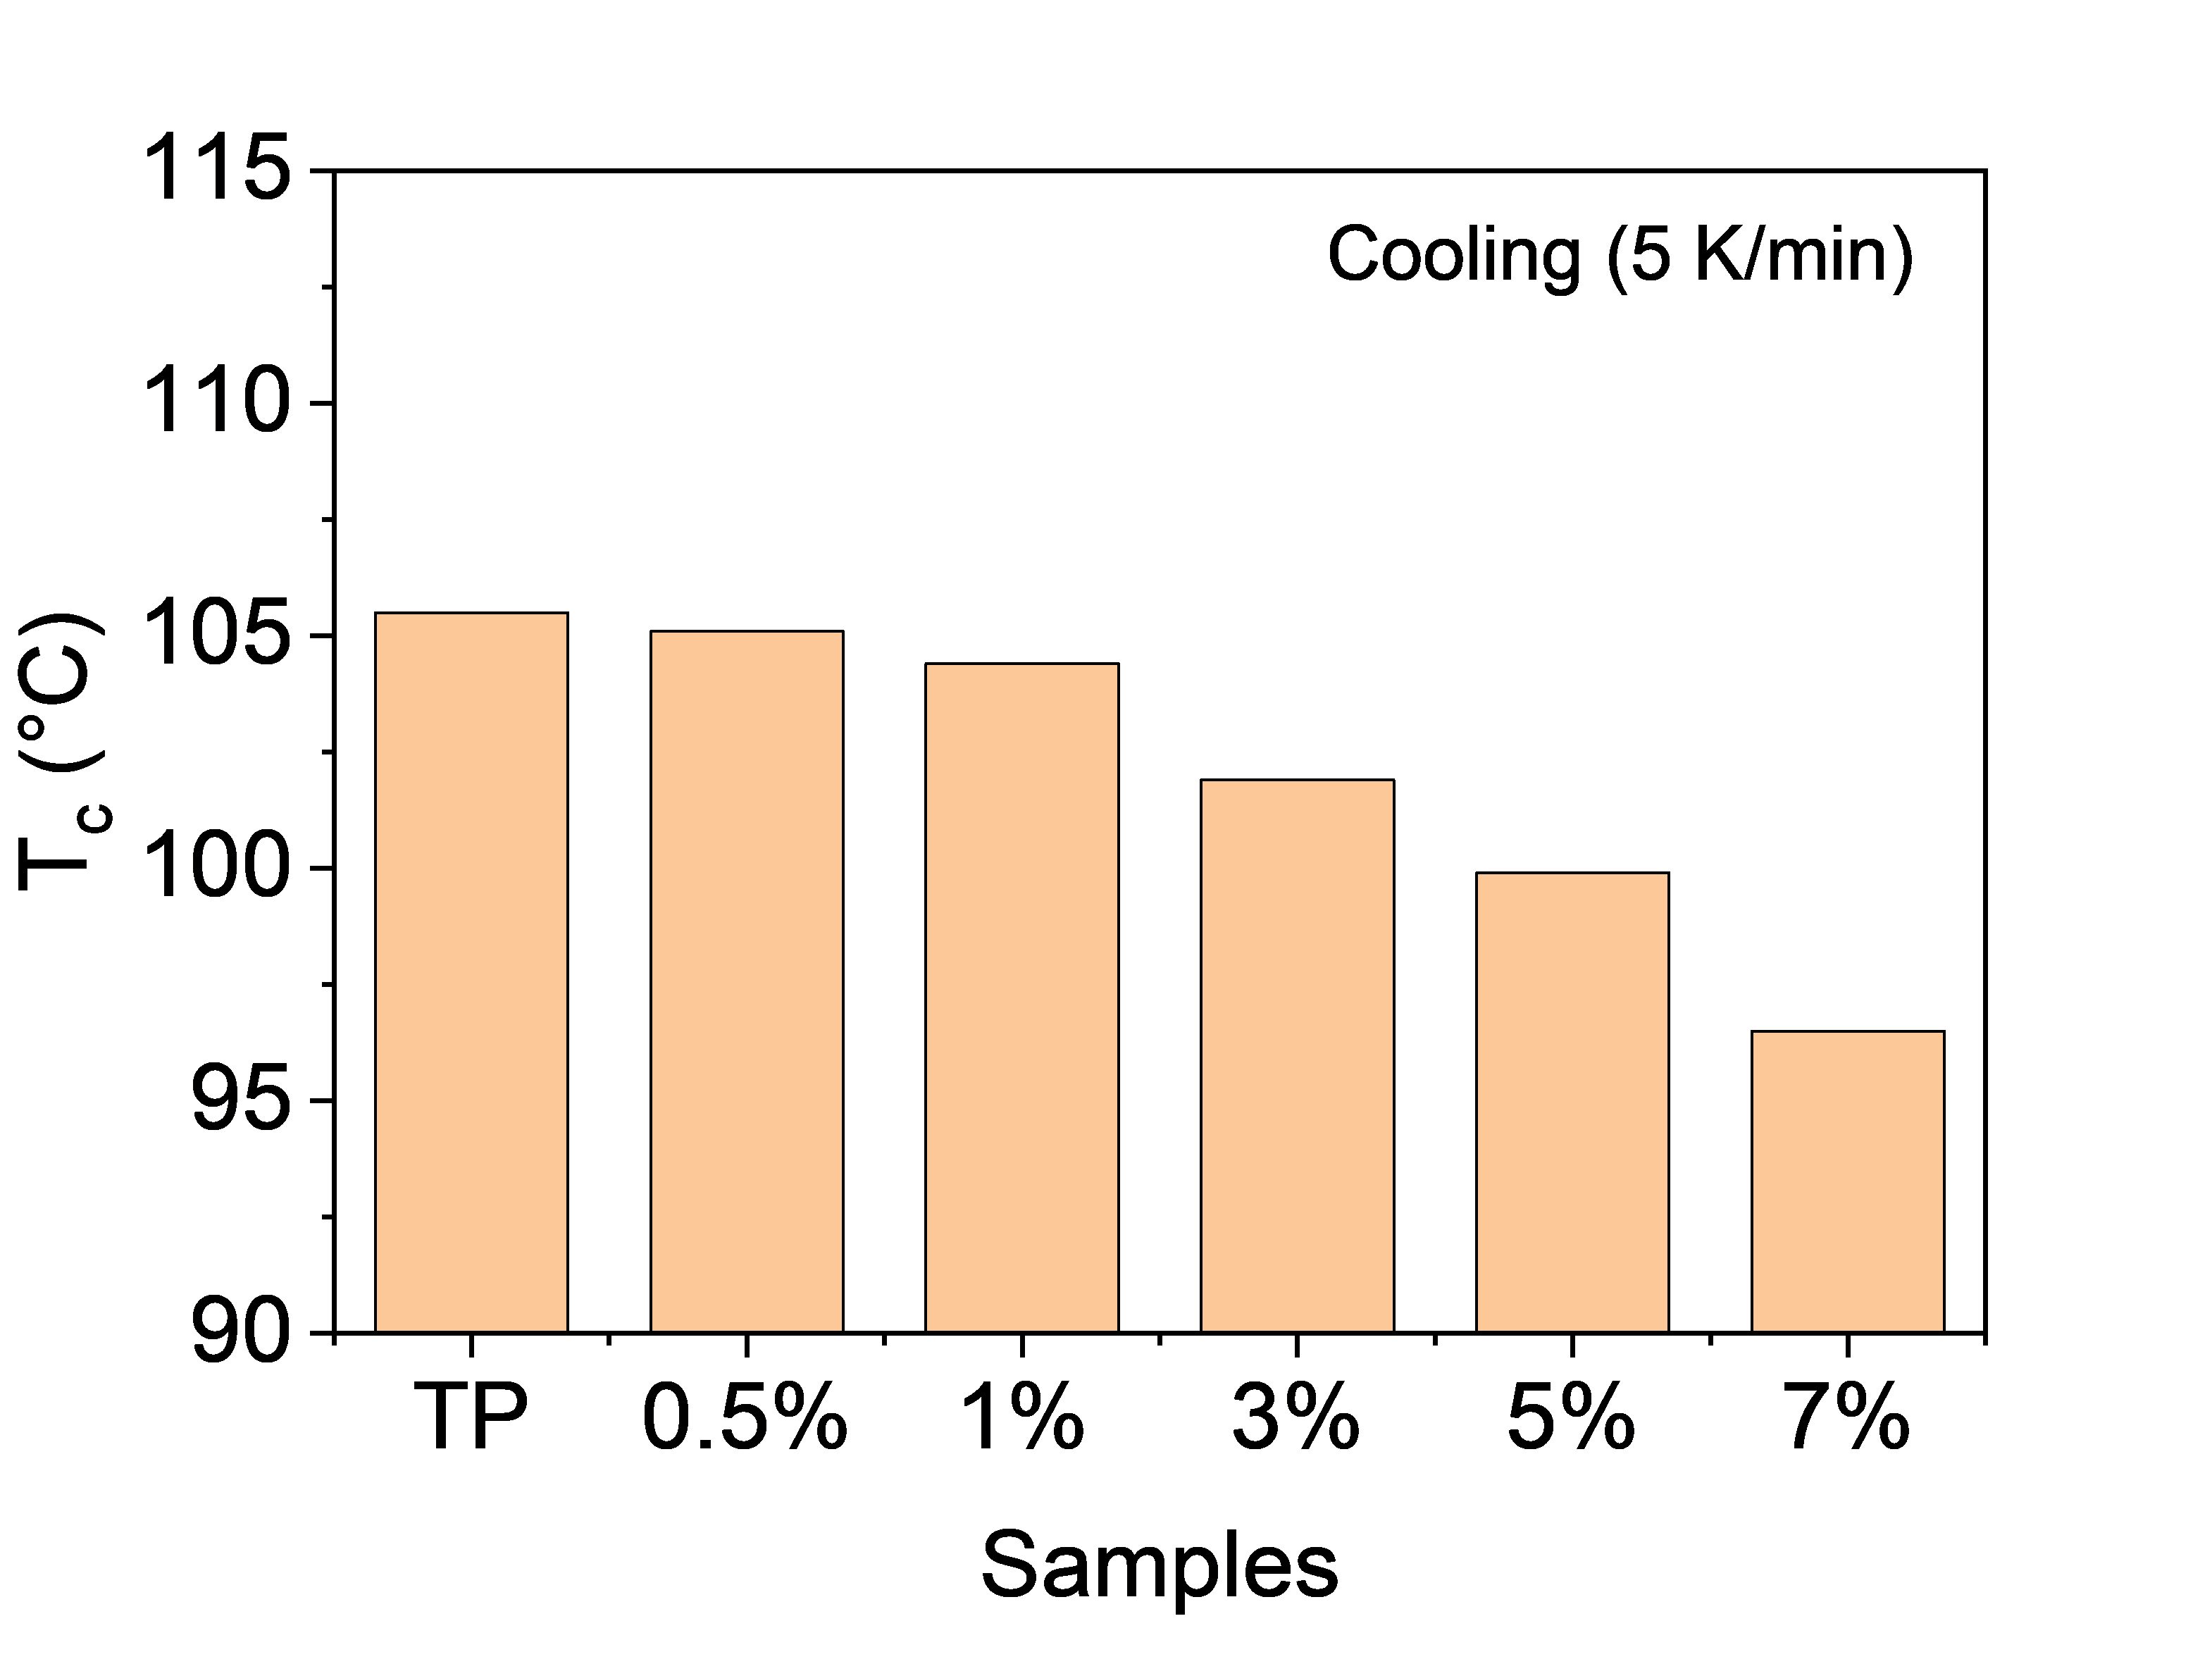


**Figure S5.** The crystallization temperature of all films.


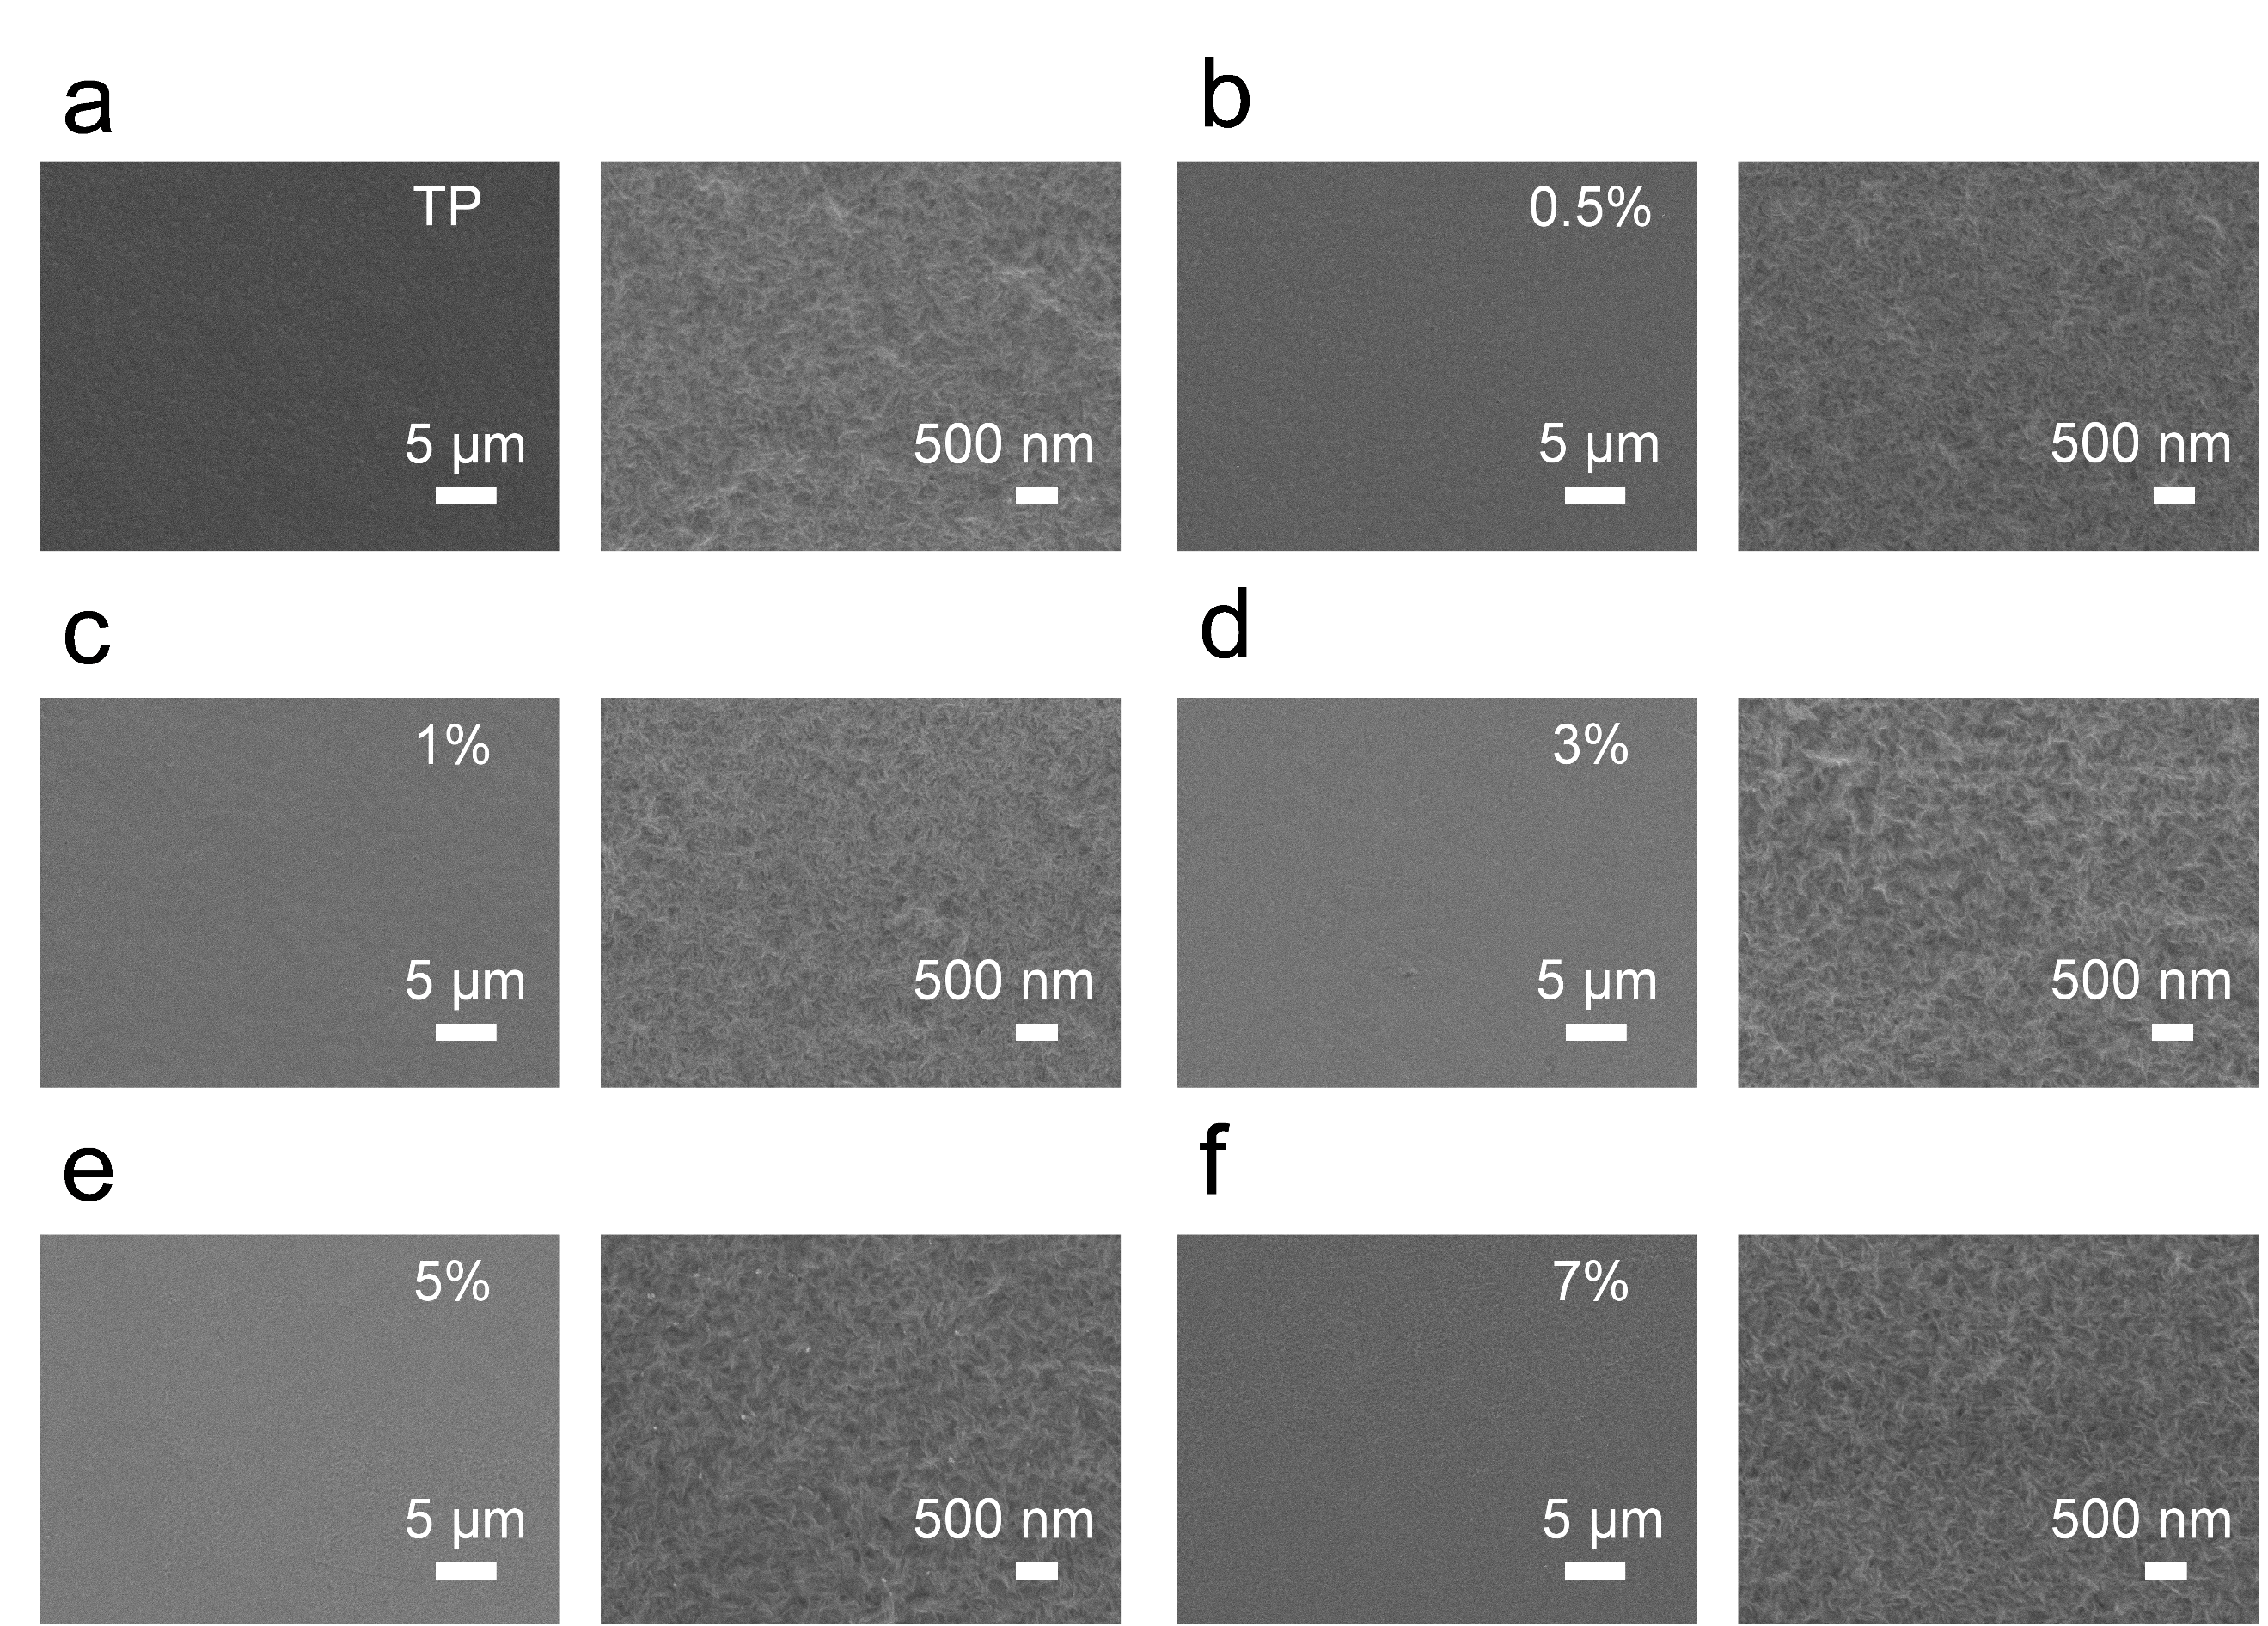


**Figure S6.** SEM images of all films: **a** TP, **b** 0.5%, **c** 1%, **d** 3%, **e** 5%, **f** 7%.


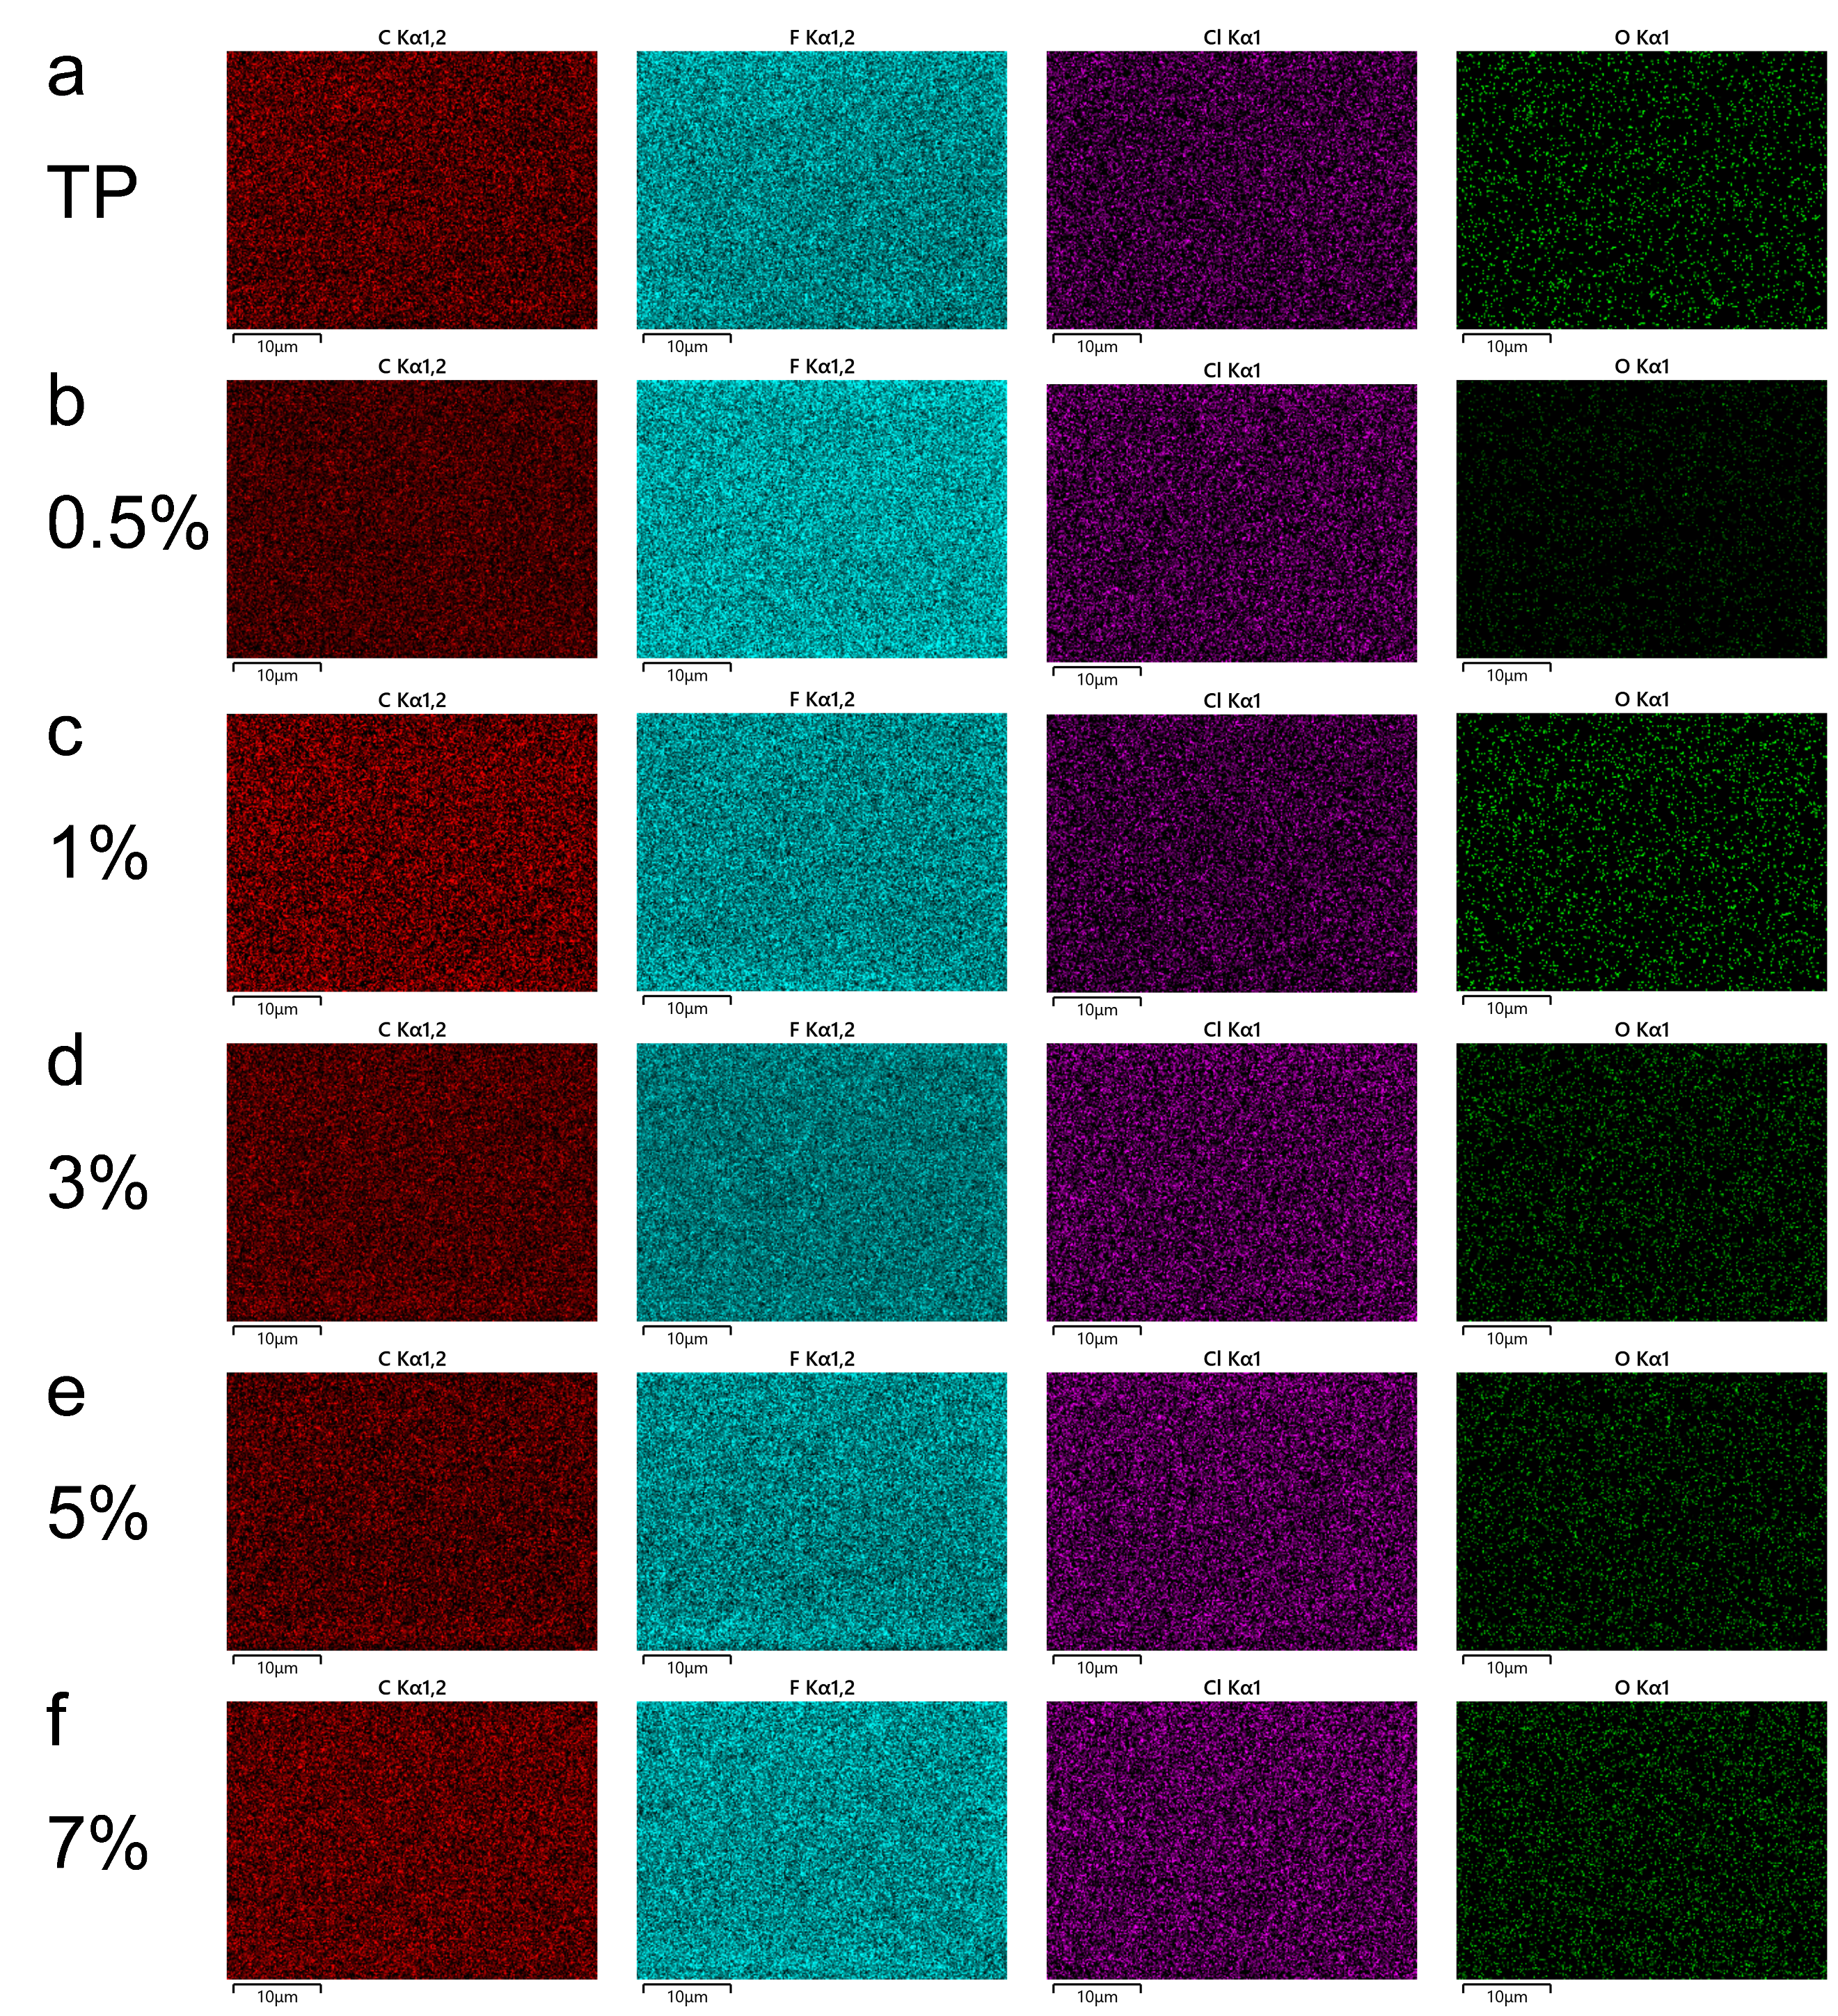


**Figure S7.** EDS mapping images of all films: **a** TP, **b** 0.5%, **c** 1%, **d** 3%, **e** 5%, **f** 7%.

**Table S1.** The elemental ratio results of all films.

|  | **C** | | | **F** | | |
| --- | --- | --- | --- | --- | --- | --- |
|  | **wt%** | **wt%**  **sigma** | **Atomic percent** | **wt%** | **wt%**  **sigma** | **Atomic percent** |
| **TP** | 46.01 | 0.21 | 58.07 | 50.38 | 0.20 | 40.20 |
| **0.5%** | 49.56 | 0.19 | 61.33 | 47.65 | 0.18 | 37.27 |
| **1%** | 49.73 | 0.19 | 61.49 | 47.20 | 0.18 | 36.90 |
| **3%** | 50.43 | 0.19 | 62.11 | 46.37 | 0.18 | 36.11 |
| **5%** | 51.05 | 0.21 | 62.82 | 44.51 | 0.20 | 34.63 |
| **7%** | 52.21 | 0.19 | 63.82 | 43.28 | 0.18 | 33.45 |
|  | **Cl** | | | **O** | | |
|  | **wt%** | **wt%**  **sigma** | **Atomic percent** | **wt%** | **wt%**  **sigma** | **Atomic percent** |
| **TP** | 3.24 | 0.04 | 1.39 | 0.36 | 0.06 | 0.35 |
| **0.5%** | 2.34 | 0.03 | 0.98 | 0.45 | 0.06 | 0.42 |
| **1%** | 2.44 | 0.03 | 1.02 | 0.63 | 0.06 | 0.58 |
| **3%** | 2.34 | 0.03 | 0.98 | 0.86 | 0.06 | 0.80 |
| **5%** | 3.06 | 0.03 | 1.27 | 1.38 | 0.07 | 1.27 |
| **7%** | 2.79 | 0.03 | 1.16 | 1.72 | 0.07 | 1.58 |


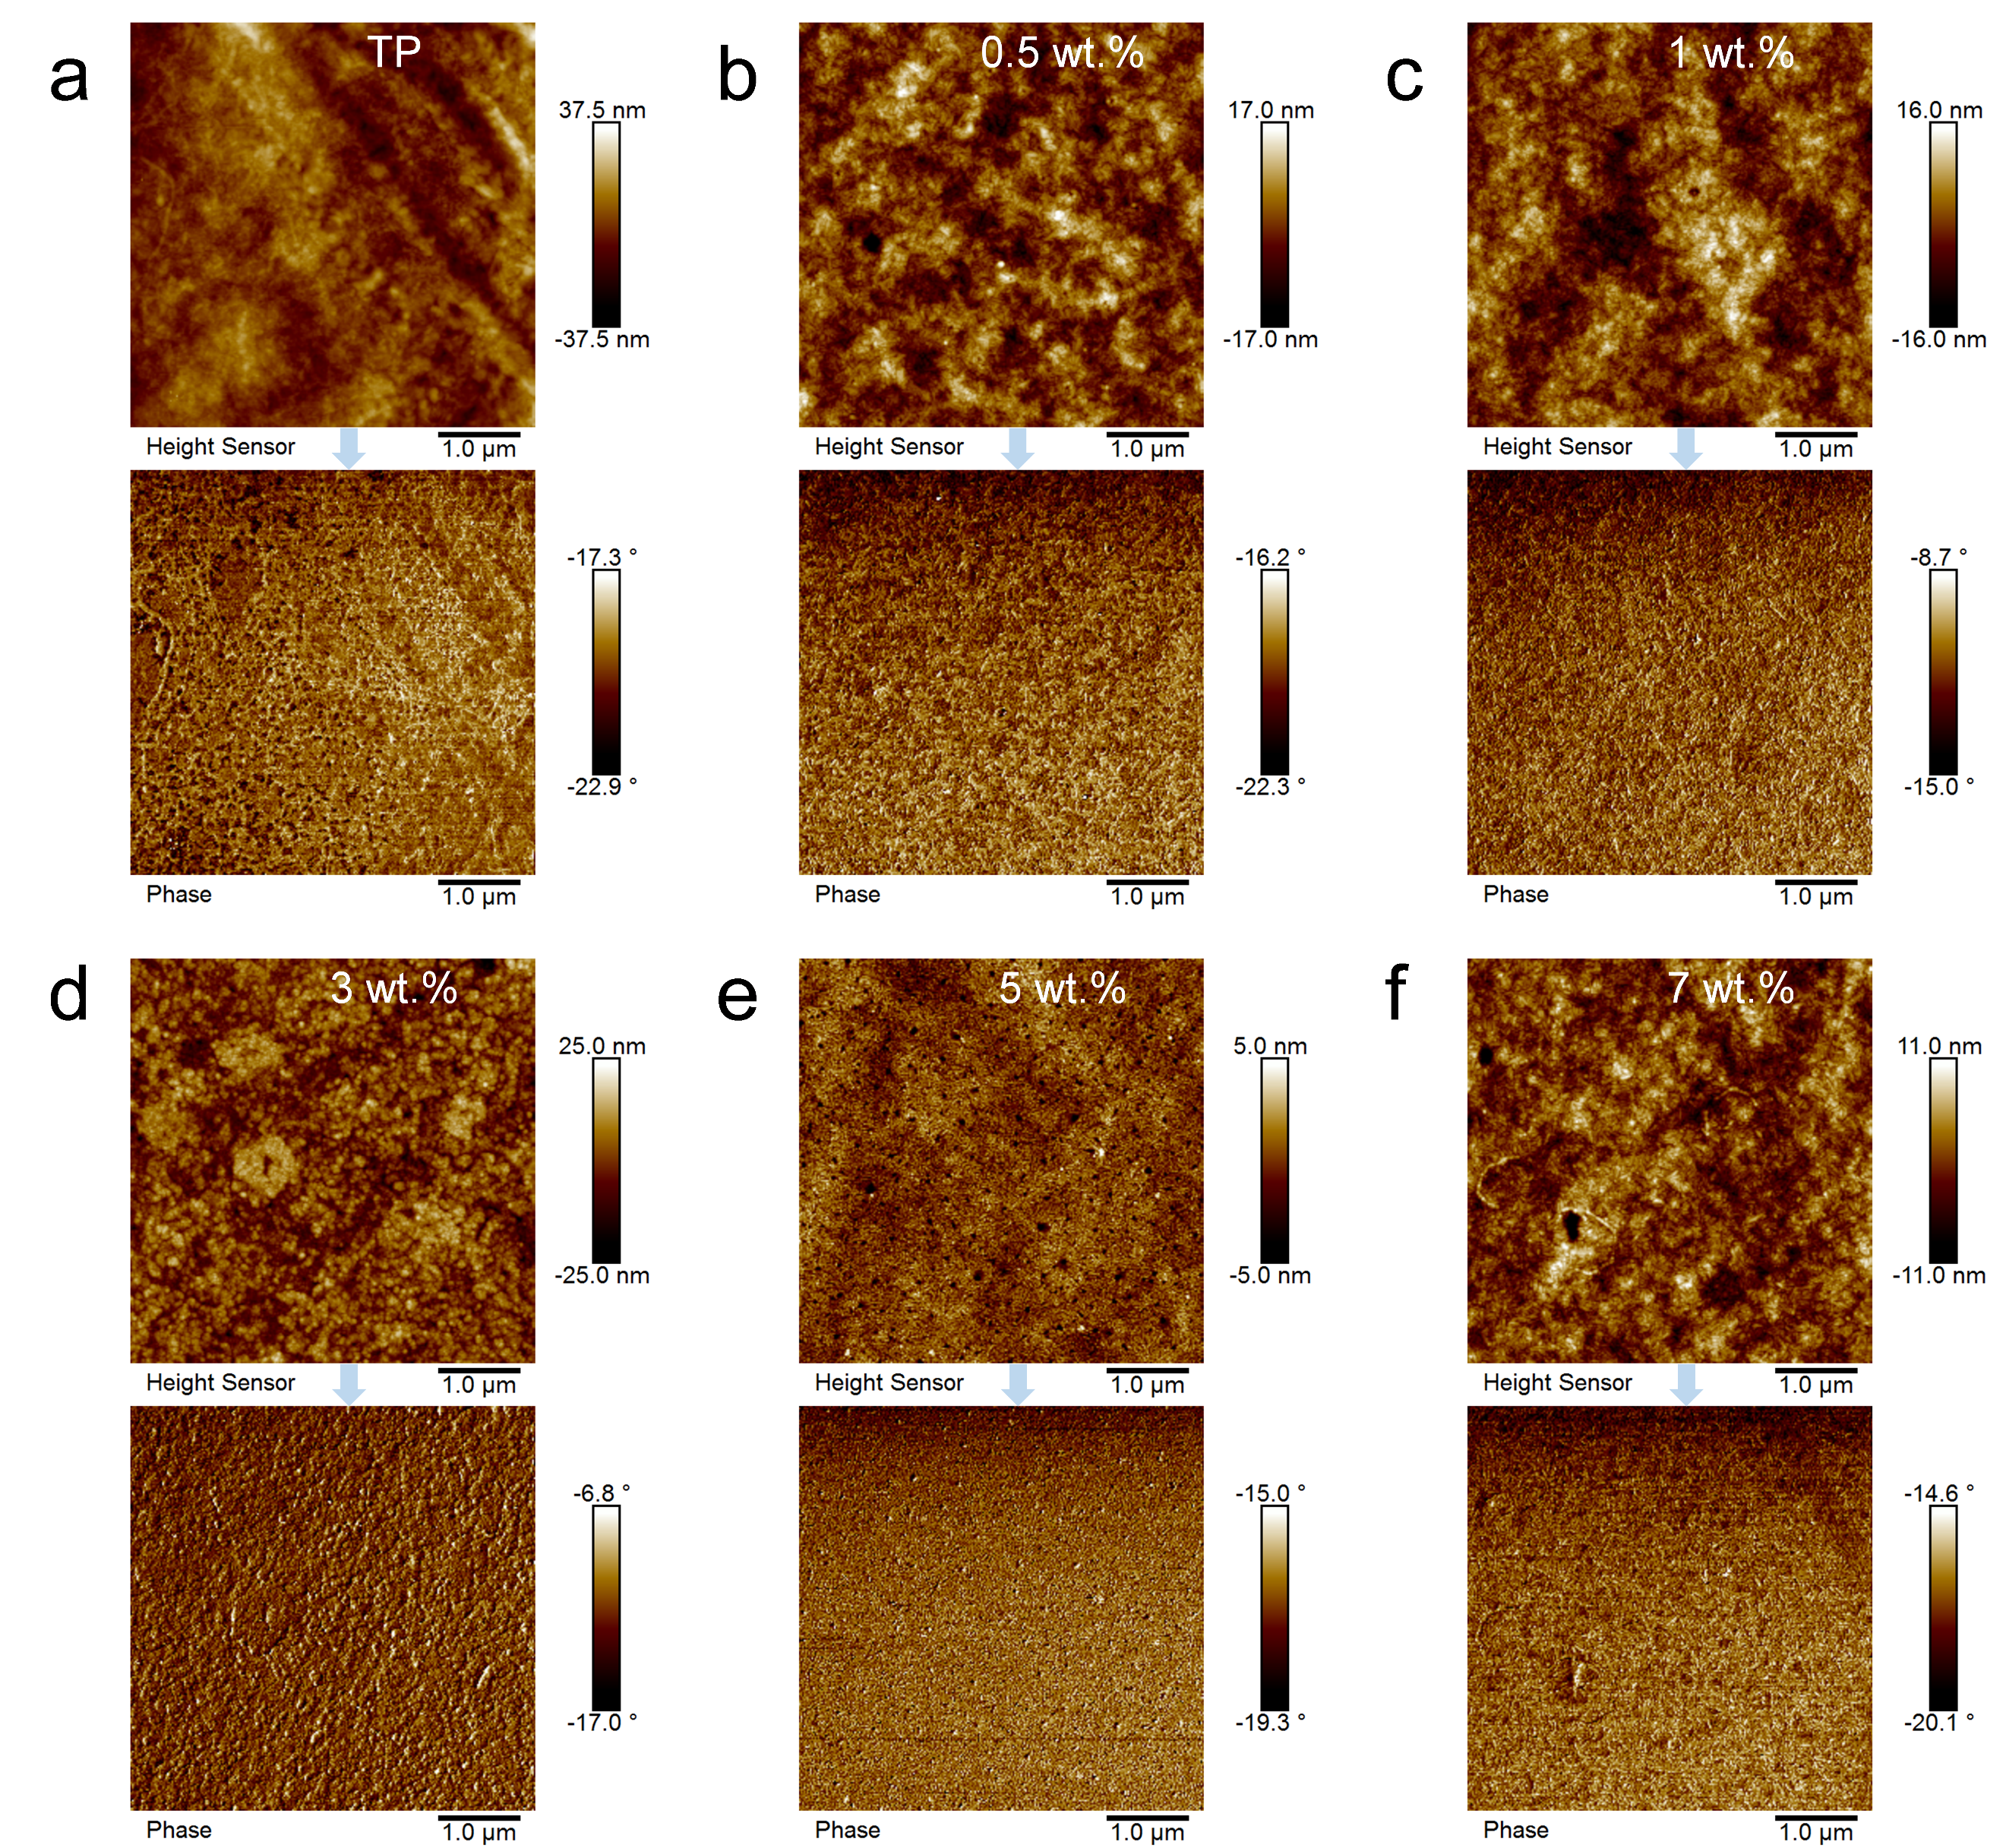
**Figure S8.** The AFM surface morphologies and phase mappings of all films: **a** TP, **b** 0.5%, **c** 1%, **d** 3%, **e** 5%, **f** 7%.

**Table S2.** εr, tanδ, Eb, and β of all films.

|  | **εr** | **tanδ** | **Eb**  **(MV/m)** | **β** |
| --- | --- | --- | --- | --- |
| **TP** | 51.29 | 0.079 | 290.57 | 14.23 |
| **0.5%** | 50.72 | 0.071 | 319.43 | 9.86 |
| **1%** | 47.02 | 0.072 | 363.16 | 12.95 |
| **3%** | 43.83 | 0.066 | 417.62 | 8.95 |
| **5%** | 40.58 | 0.063 | 437.33 | 12.85 |
| **7%** | 38.80 | 0.064 | 488.12 | 14.92 |


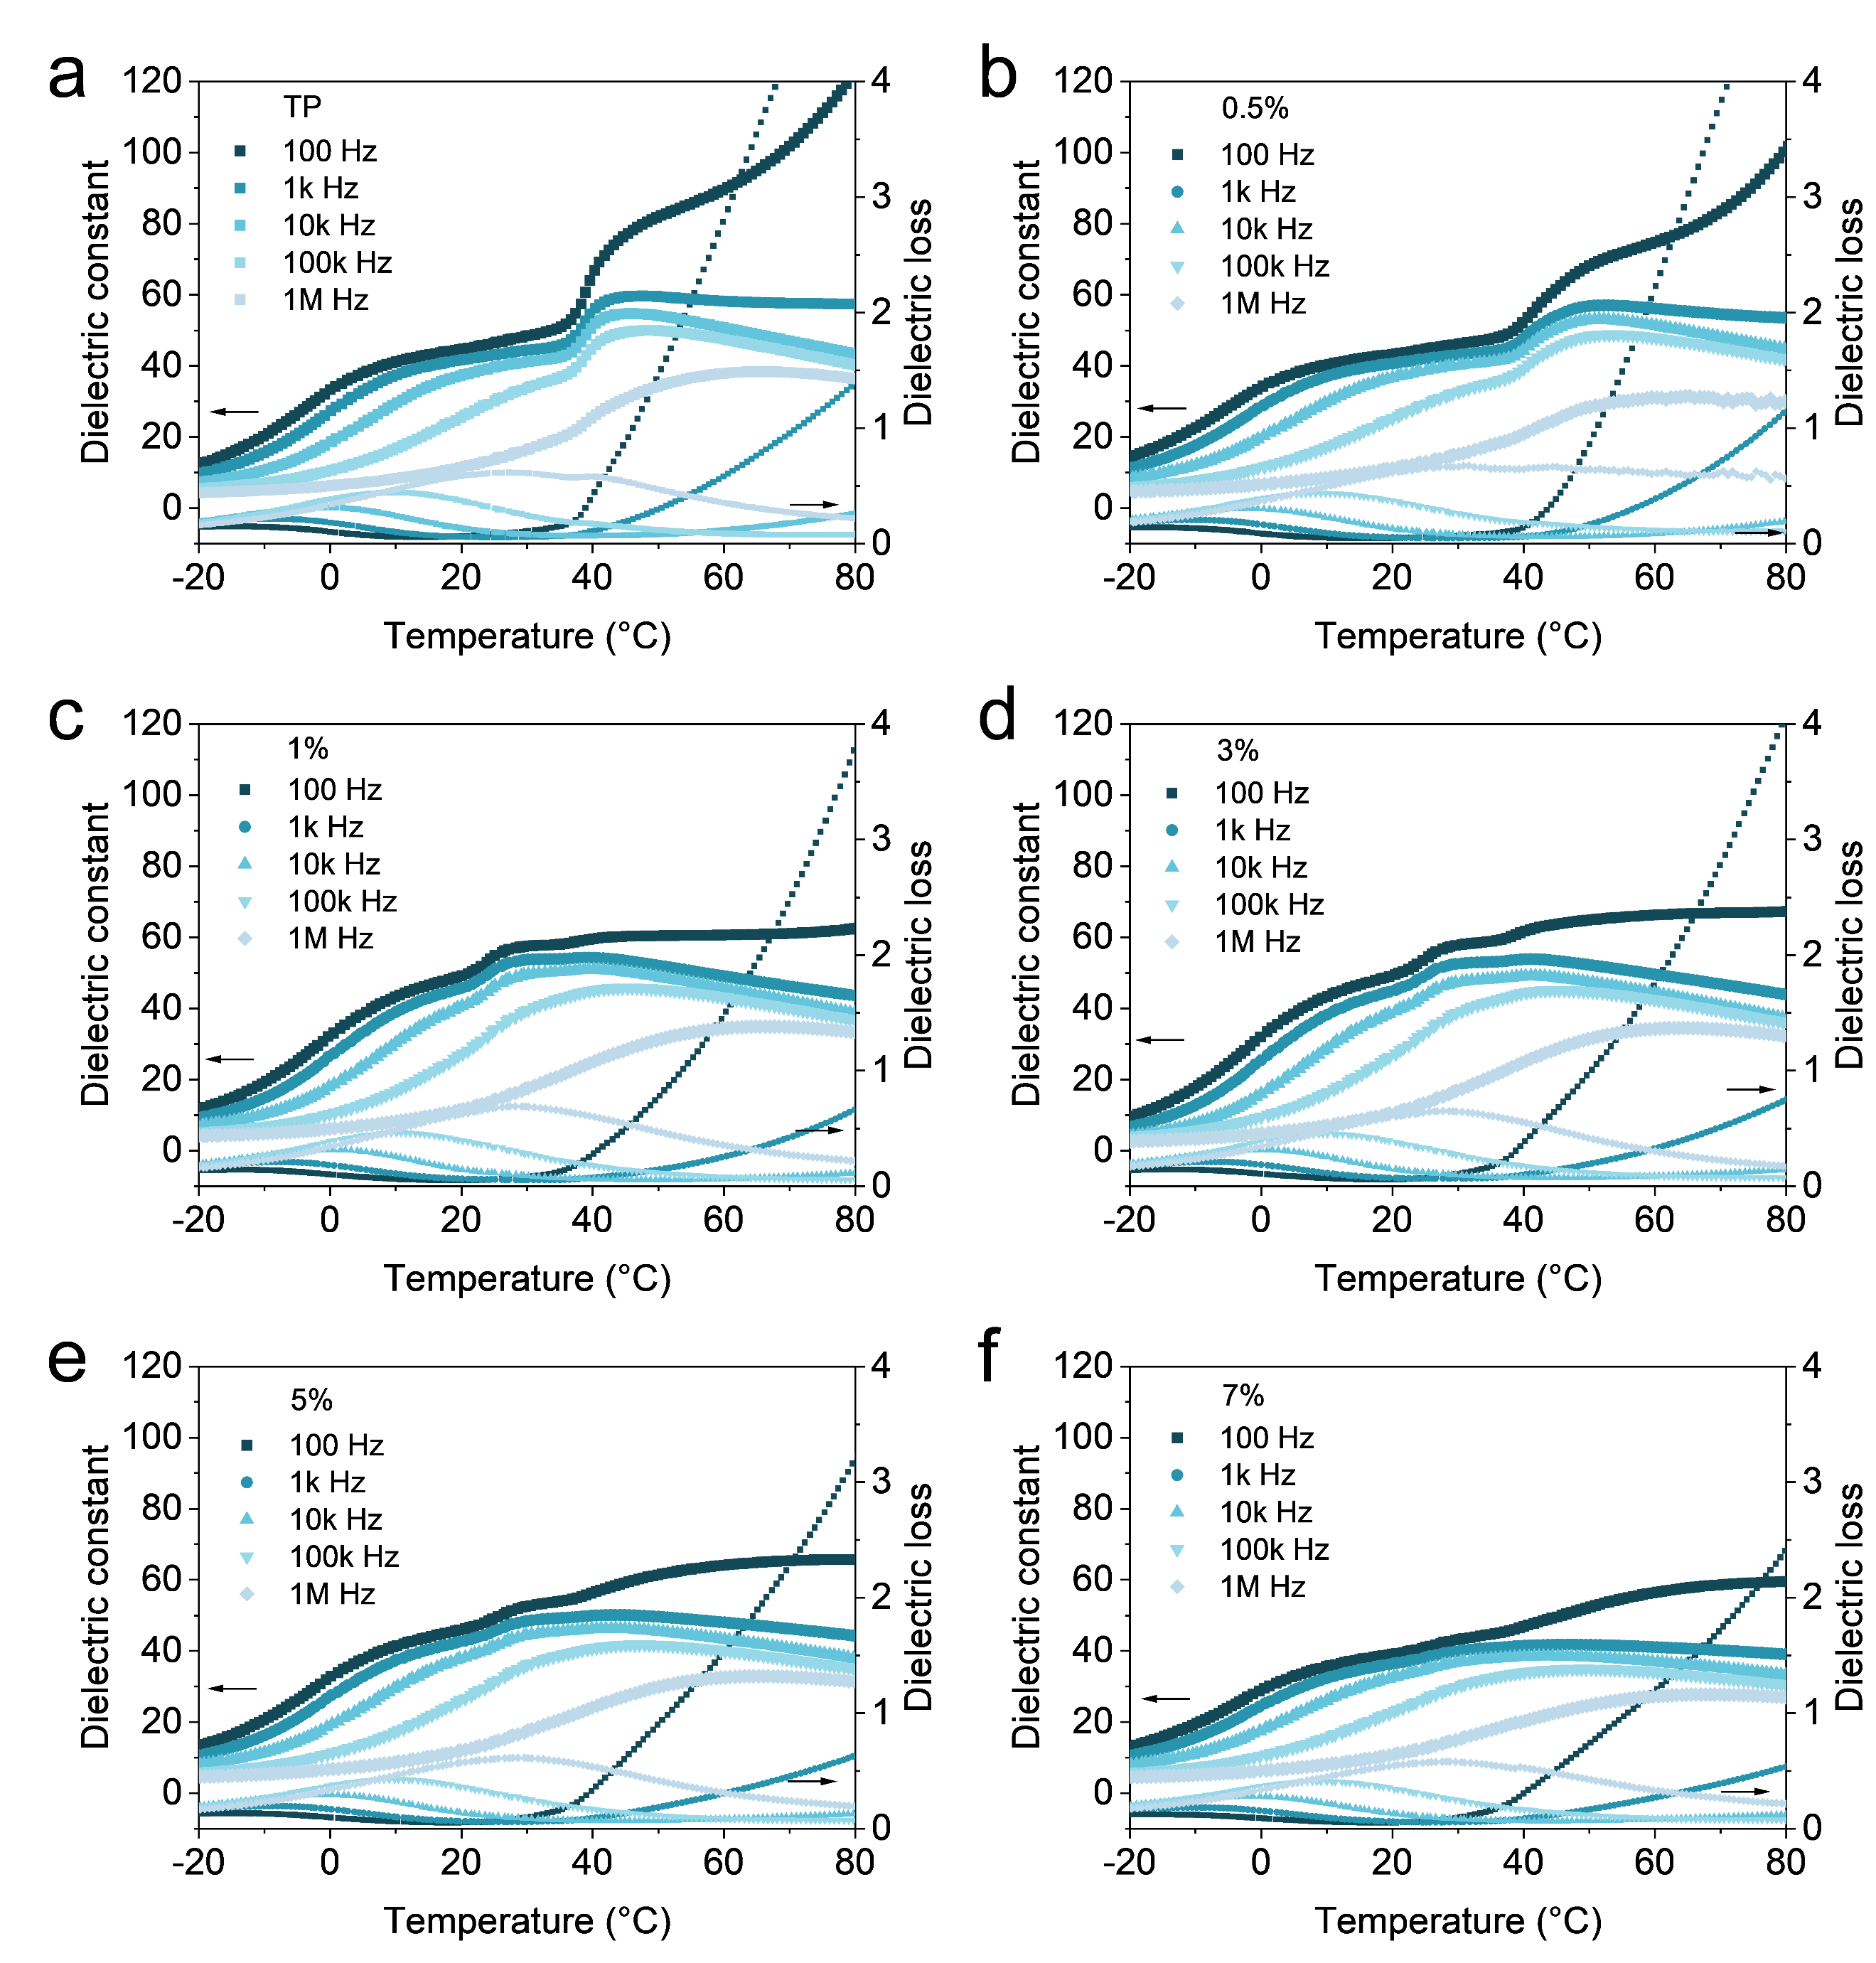
**Figure S9.** Temperature-dependent permittivity and losses of all films: **a** TP, **b** 0.5%, **c** 1%, **d** 3%, **e** 5%, **f** 7%.

**Table S3.** Values of γ and lnC corresponding to different films.

|  | **γ** | **lnC** |
| --- | --- | --- |
| **TP** | 1.48 | 10.53 |
| **0.5%** | 1.52 | 10.70 |
| **1%** | 1.53 | 10.68 |
| **3%** | 1.55 | 10.84 |
| **5%** | 1.67 | 11.32 |
| **7%** | 1.92 | 12.33 |


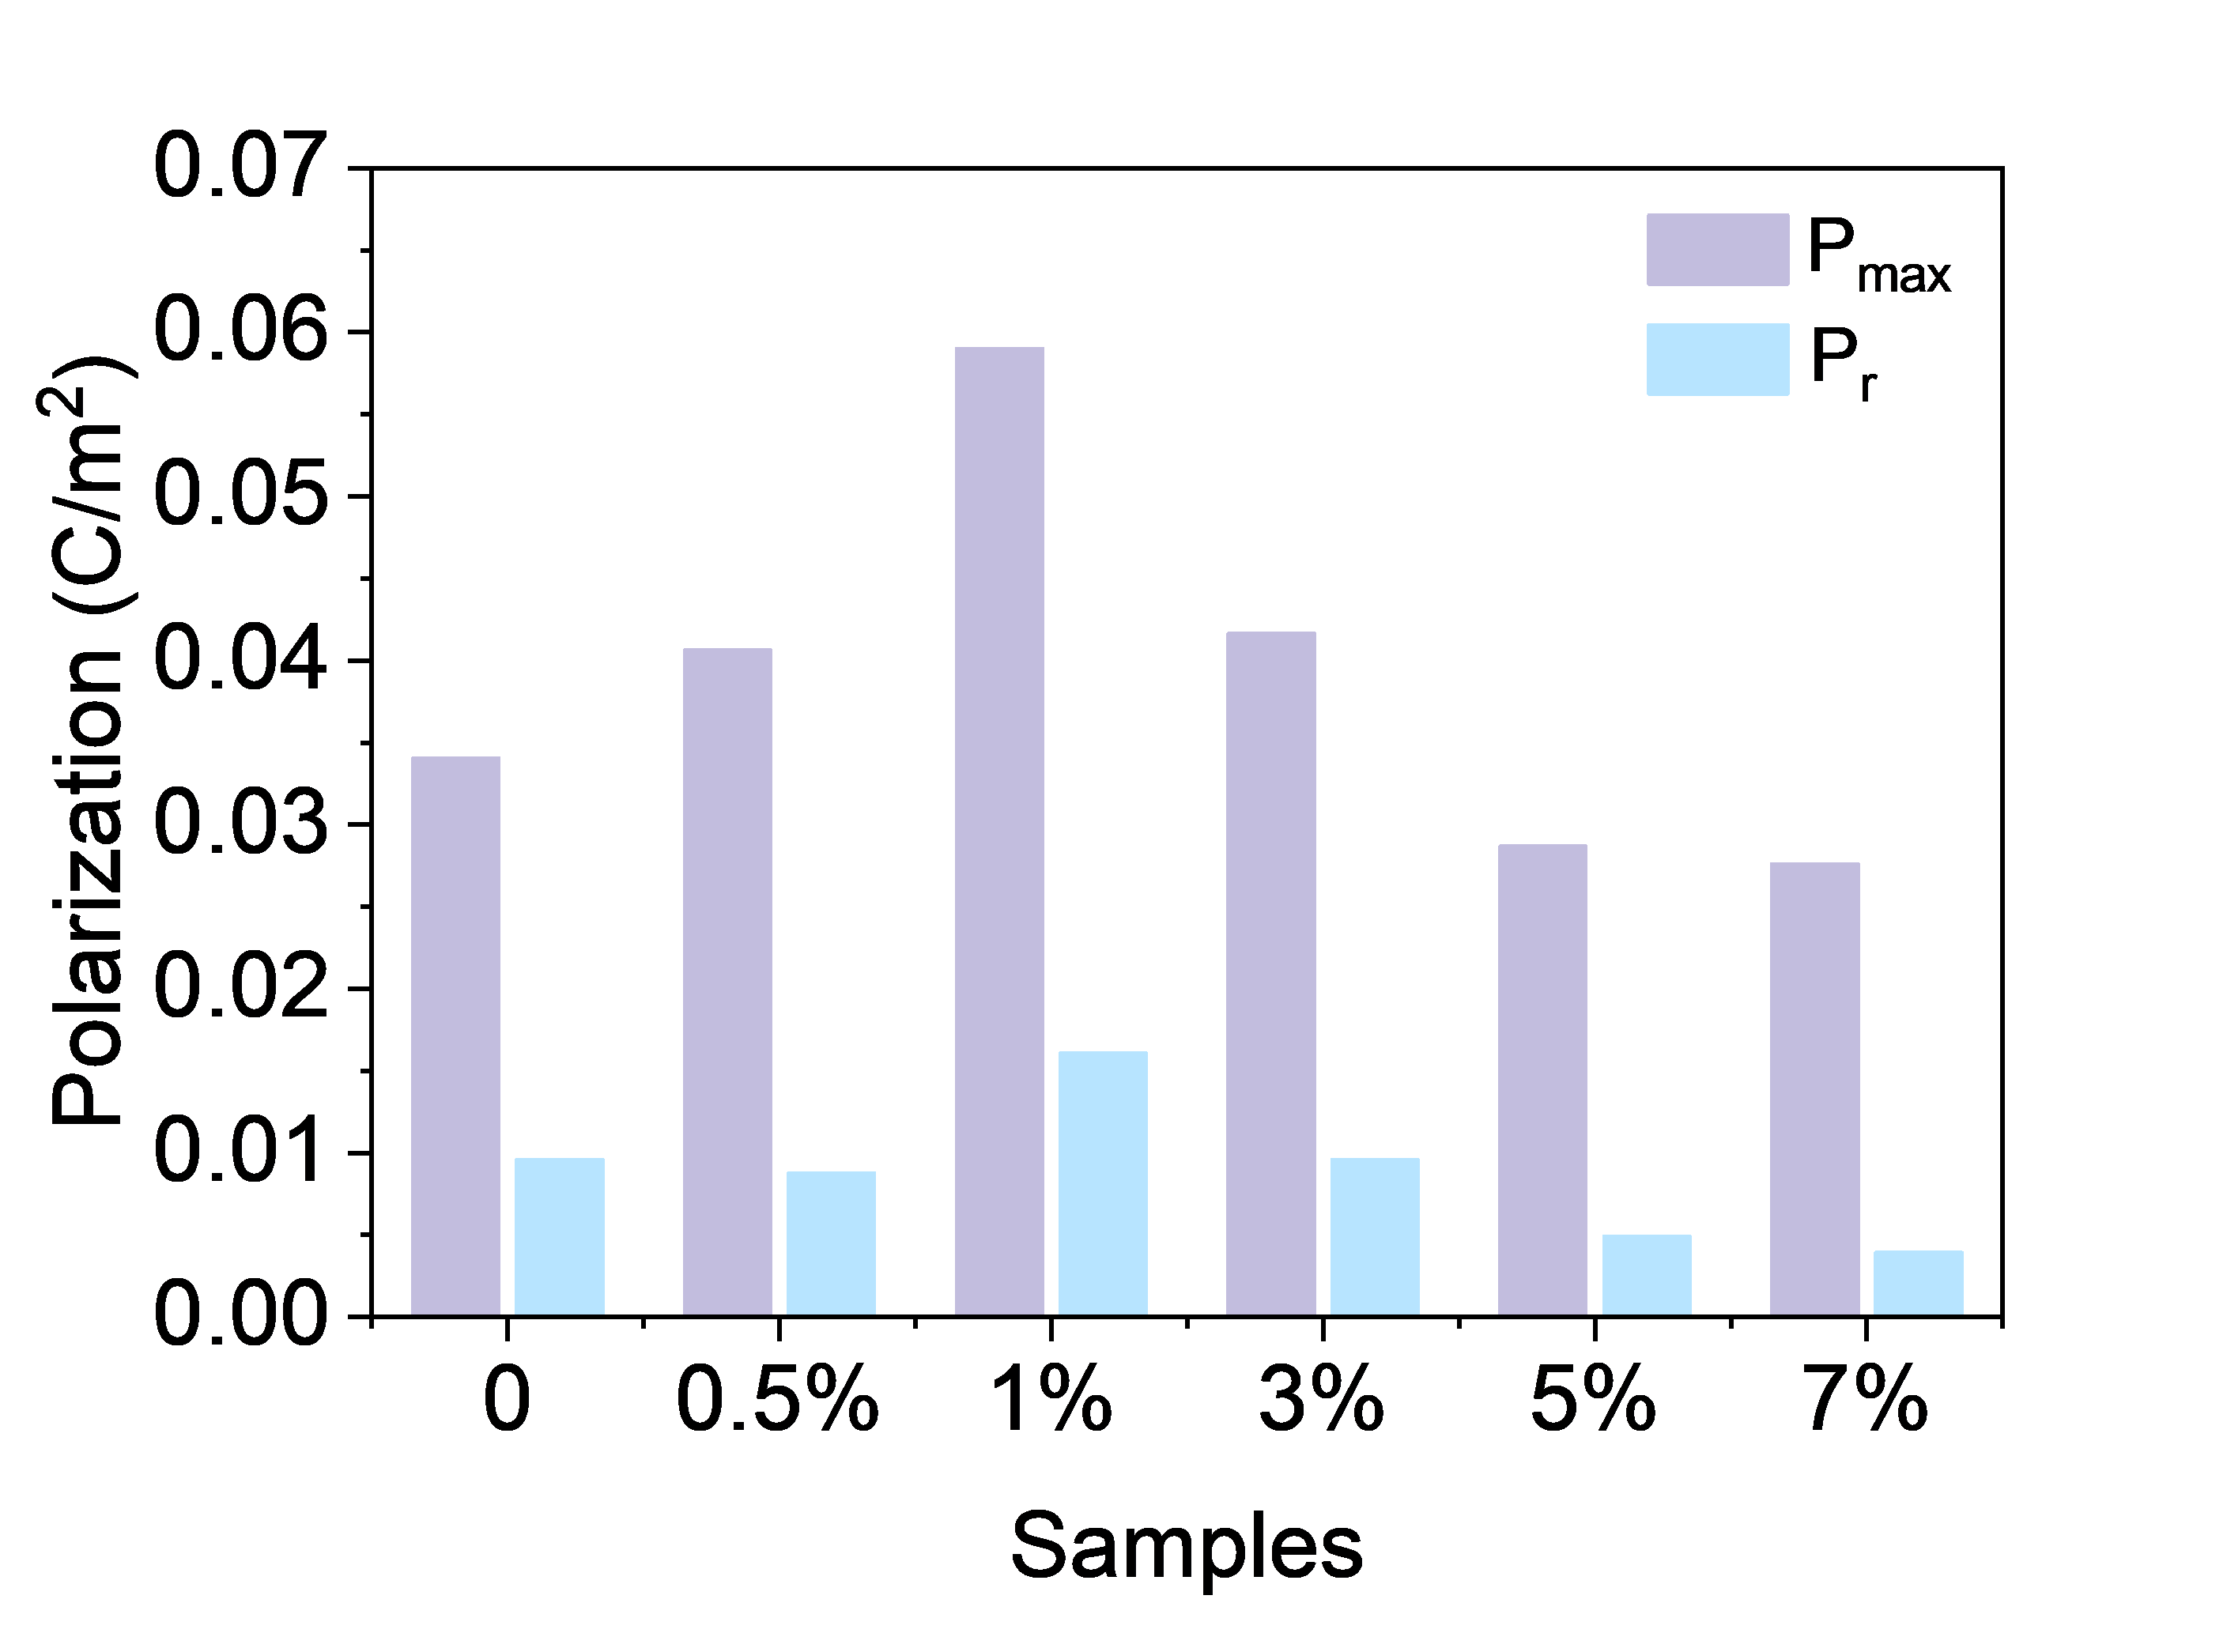


**Figure S10.** Pmax and Pr of all films at 100 MV/m.


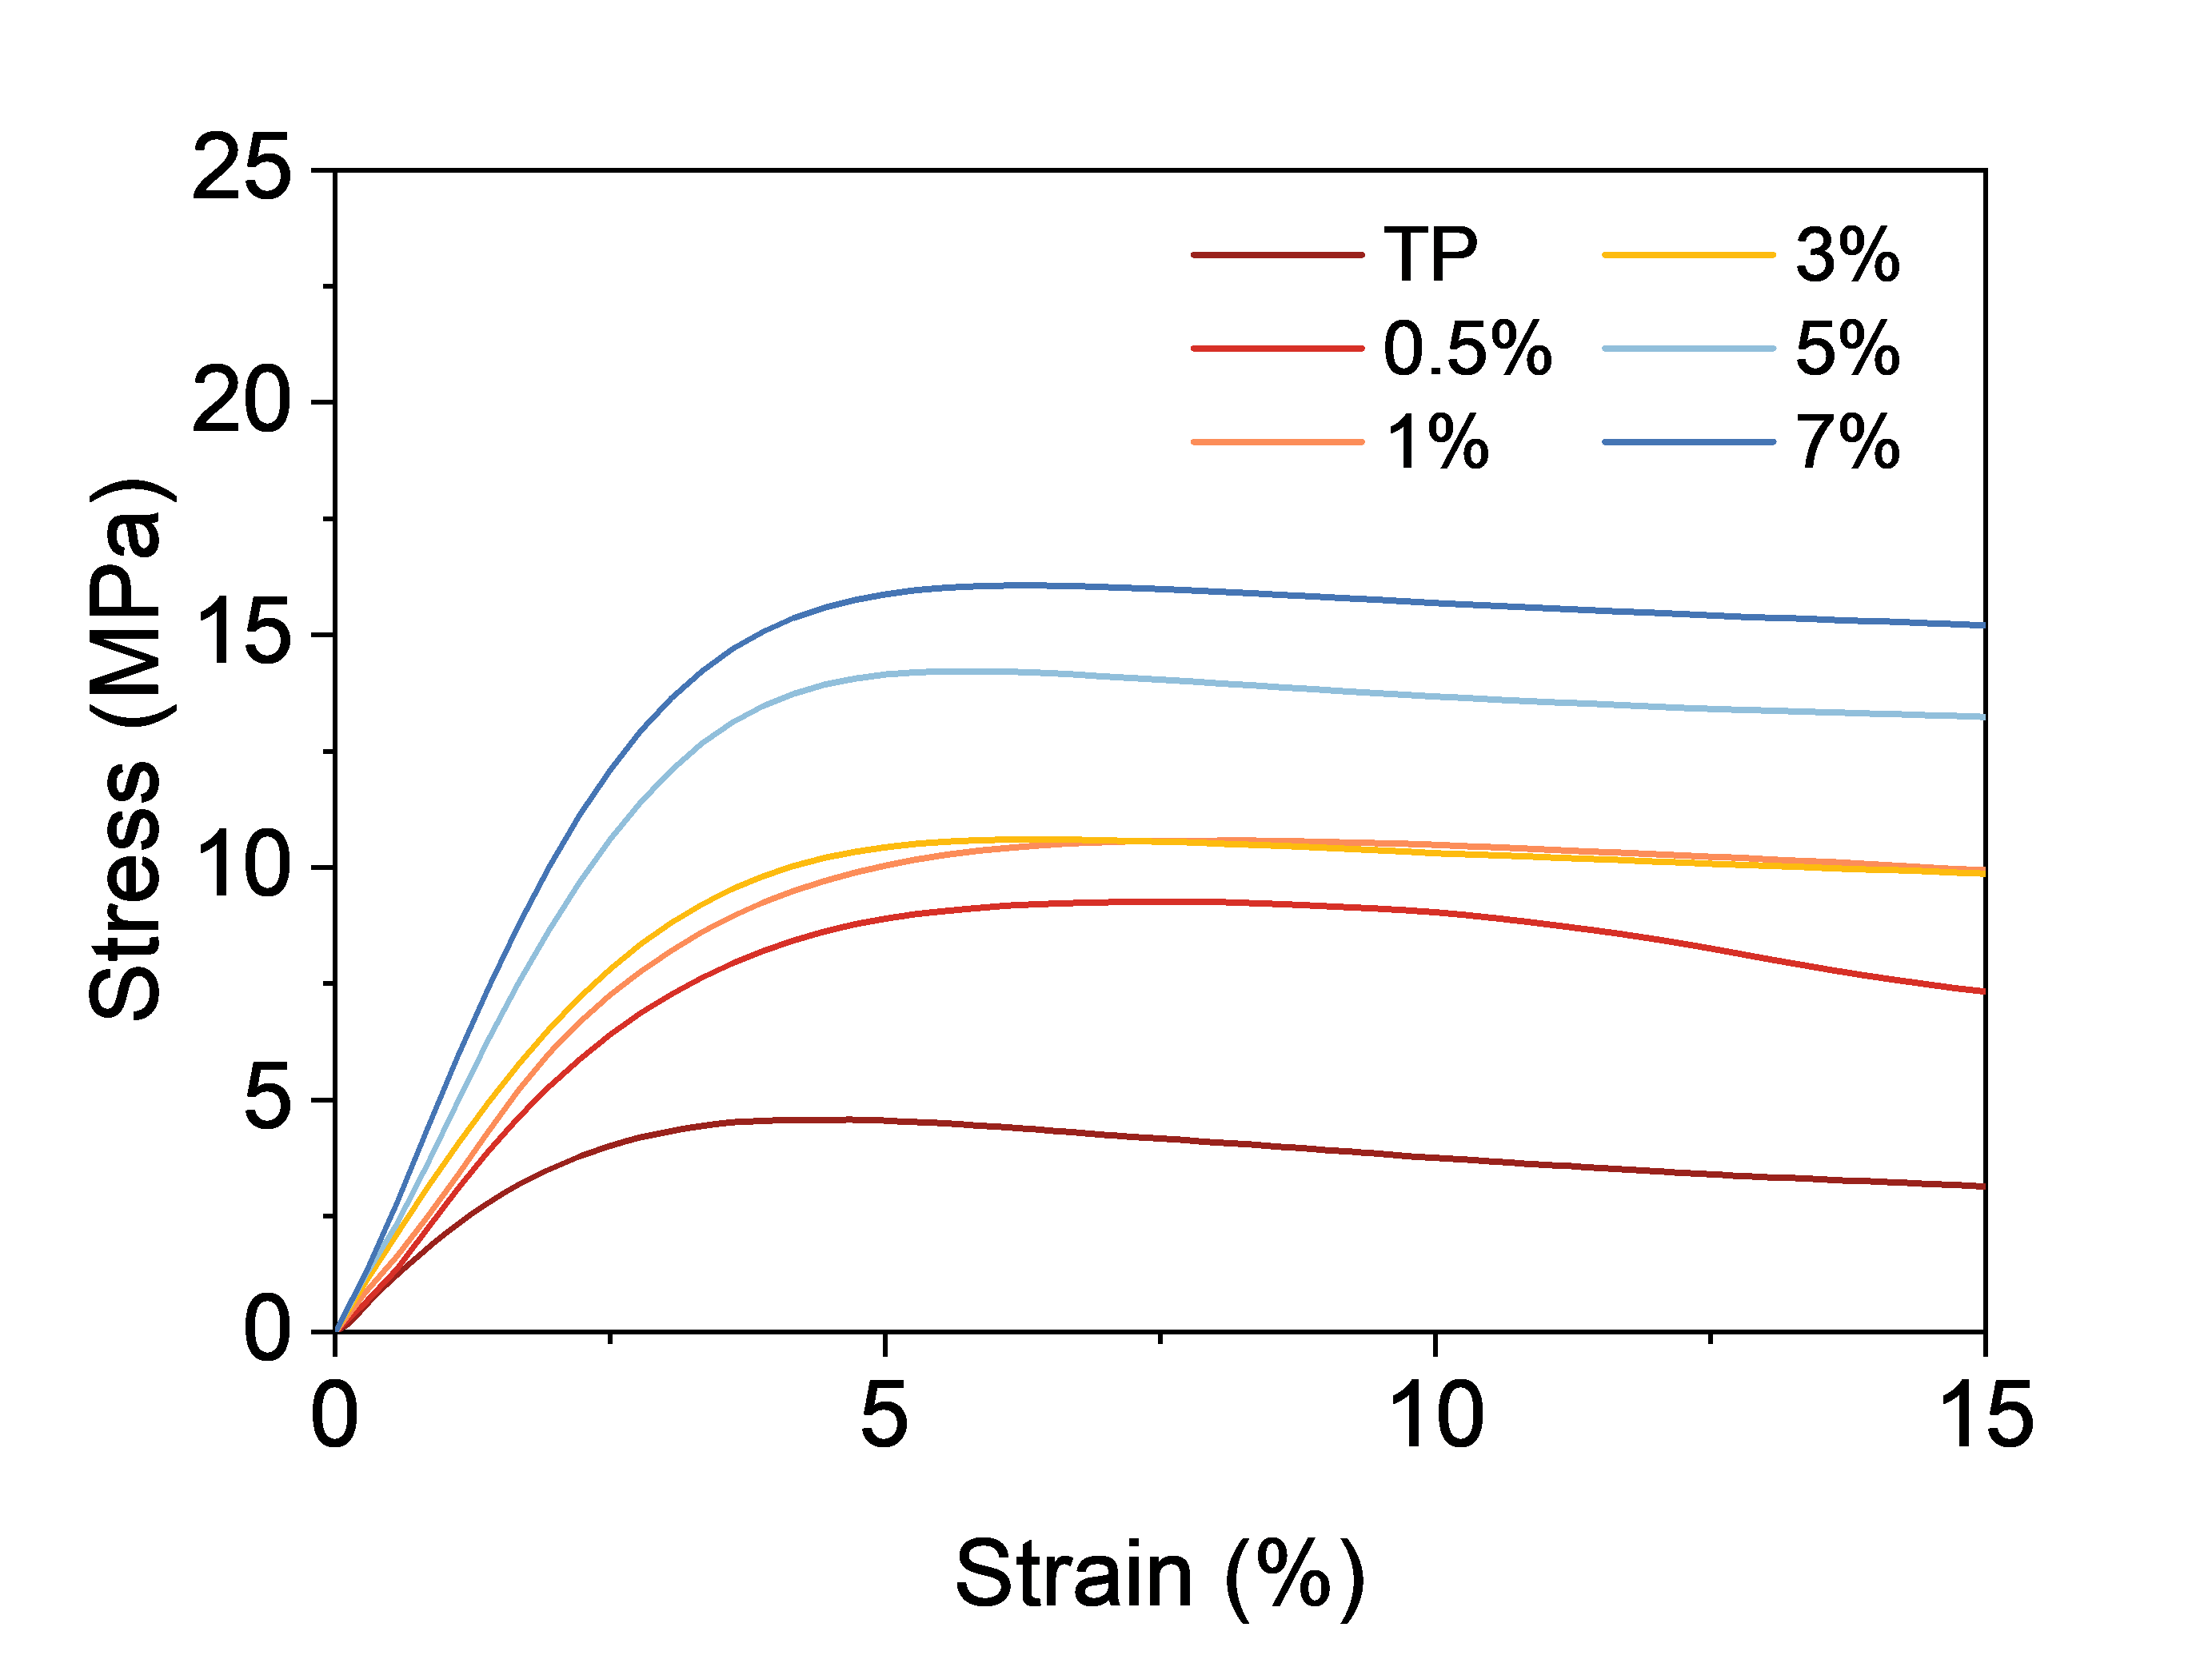


**Figure S11.** Local magnification of stress-strain curves.

**Supplementary Note 4. Device description and test principle of electrocaloric effect test system**

The silver electrode was evaporated on the upper and lower surfaces of the EC film by vacuum evaporation. The upper and lower surfaces of the silver electrode are completely overlapped, and the electrode is a circle with a diameter of 6 mm. The thickness of all silver electrodes was controlled at 100 nm. Three silver wires with a diameter of 100 microns were bonded to the surface of the silver electrode using conductive silver epoxy resin. Two silver wires were connected to the top electrode and one silver wire was connected to the bottom electrode. The conductive silver epoxy resin was cured at 80°C for 1 h. The bonding positions of the silver epoxy resin do not overlap with each other, so that the additional silver epoxy resin does not affect the overall area of the ECE. The EC film is pasted onto the heat flux sensor with a thin layer of thermally conductive silicone grease (electrically insulating). The heat flux sensor is placed on a ceramic heat sink and similarly secured using thermally conductive silicone grease. The entire ECE measurement system is placed in an acrylic vacuum chamber, equipped with a vacuum pump and a nitrogen bottle. After each sample is placed, the vacuum chamber is replaced three times to ensure that the ECE measurement is in a nitrogen environment. The ambient temperature was controlled at 25°C during the ECE measurement, and the sample was placed in advance to ensure that the initial temperature of the sample was consistent with the room temperature.

The EC performance was tested by direct measurement. In the process of removing or applying an electric field, the heat absorbed/released by the material is measured and calibrated in situ by a heat flux sensor. During this short period of electric field change, the film was unable to exchange heat with the environment, due to the extremely low thermal conductivity of air (~0.026 W/m/K) compared to heat flow sensor and heat sink, making the process nearly adiabatic. In the Joule heating measurement process, the low-voltage power supply applies the pulse voltage UJoule to the silver electrode at the top of the polymer through the wire ① and the wire ②, and the resistance of the top silver electrode between the wire ① and the wire ② is R. The Joule heat generated by the film is transferred to the heat flux sensor to obtain the curve of the output voltage VJoule and time t of the heat flux sensor. Joule heat QJoule is calculated using Joule 's law, and the integral area of the curves of different voltages is linearly fitted to obtain the slope k. Under the same thermal boundary conditions, the high-voltage power supply applies a pulse voltage UECE to the film through wire ① and wire ③, and the heat release/absorption generated by the film is transmitted to the heat flux sensor, thereby obtaining the output voltage VECE and time t of the heat flux sensor. The calculation formulas of QJoule and QECE are as follows:

It is assumed that all QECE values are used to change the film temperature in the effective electrode region. The temperature change ΔTECE and entropy change ΔSECE of the film are calculated as follows:

The density ρ of TP is assumed to be 1780 kg/m3, ρ of PMMA is assumed to be 1150 kg/m3. The specific heat capacity Cp of TP is 1500 J/kg/K, Cp of PMMA is 1465 J/kg/K. r is the radius of the overlap area of the electrodes. d is the thickness of the polymer which was measured using a thickness gauge. And T represents the test temperature, typically 25°C.

The film for long-term ECE measurement is exactly the same as the film for ordinary ECE measurement. The long-term ECE measurement process was carried out in an ordinary indoor laboratory at room temperature without any special environmental control.


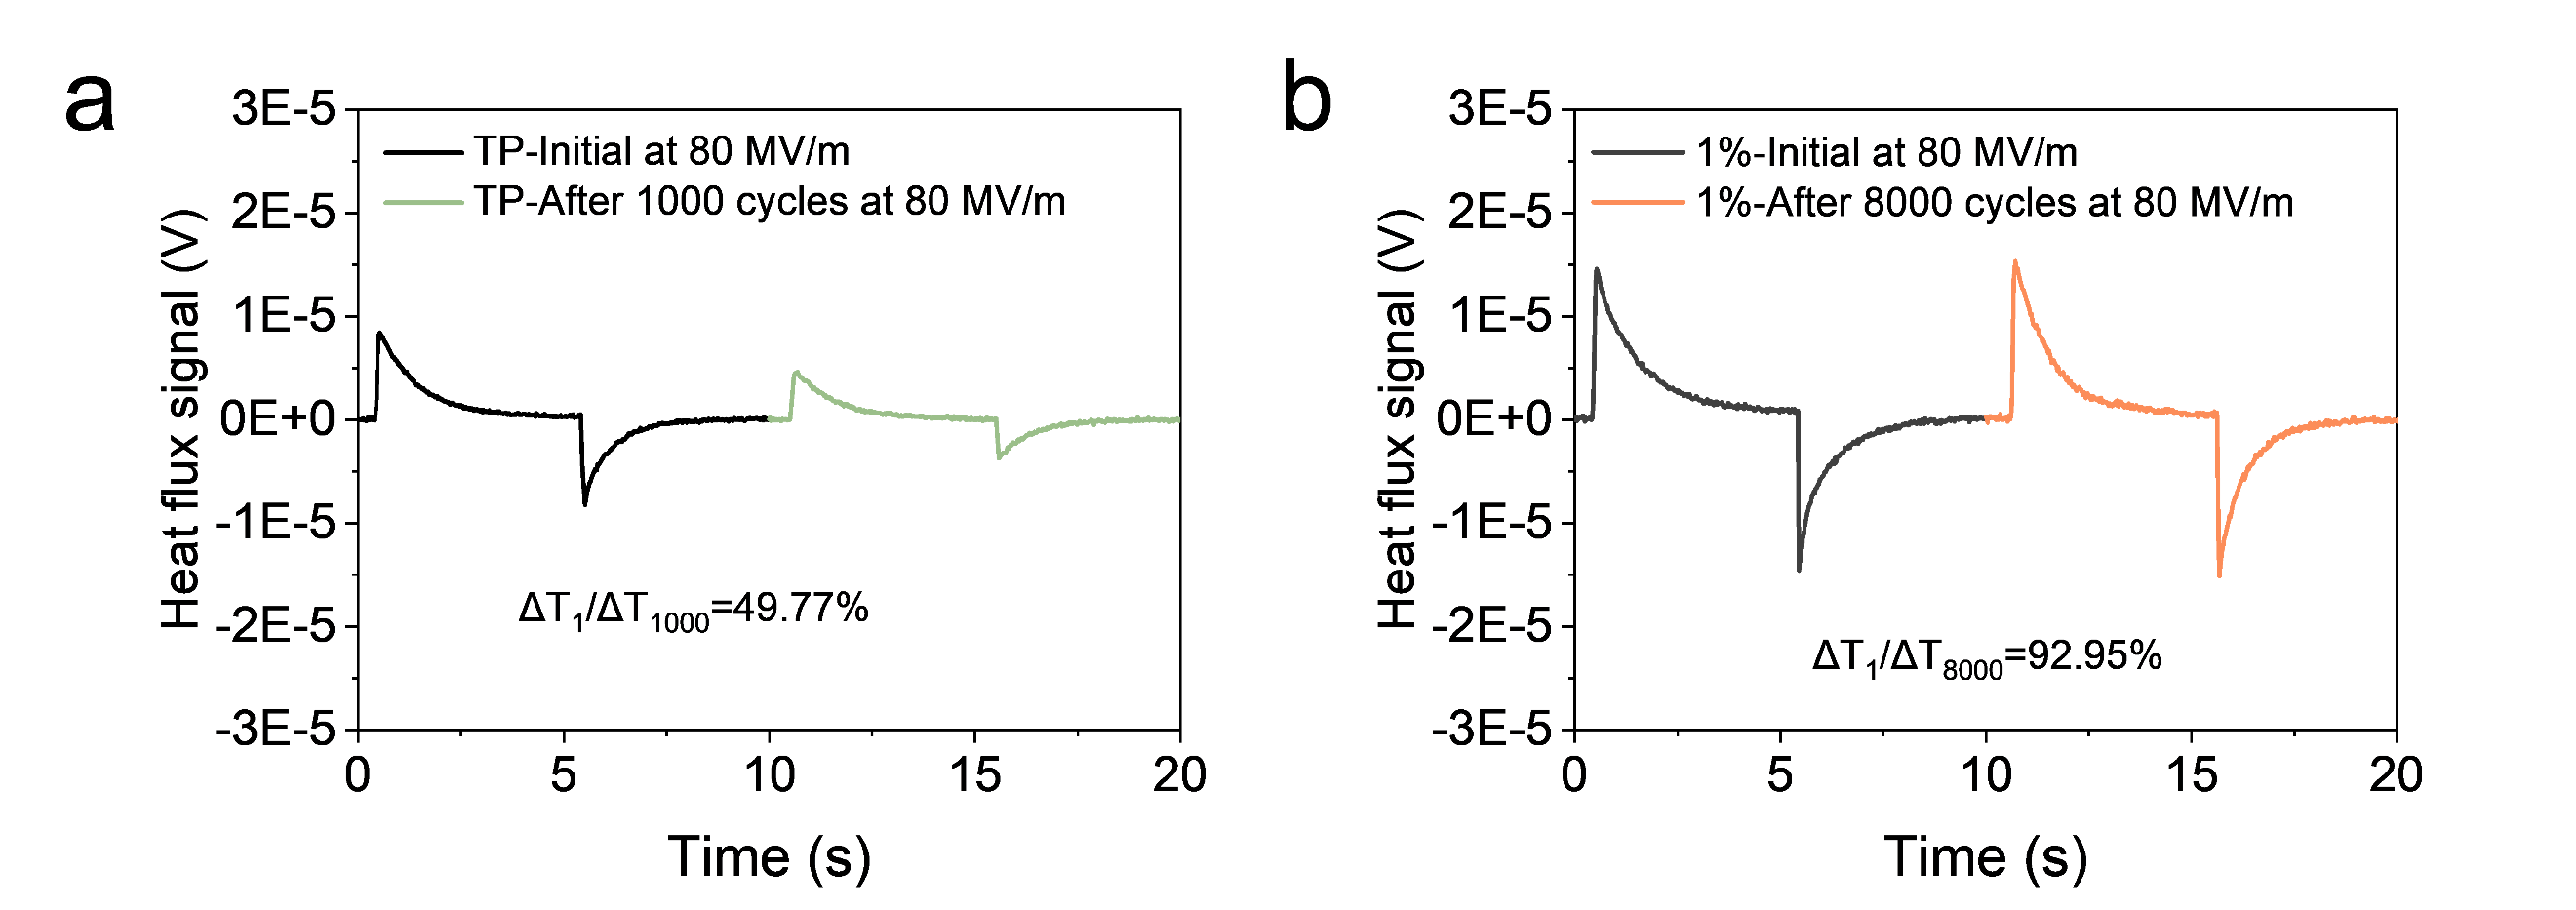


**Figure S12. a** The heat flux signal of TP film measured at 80 MV/m for 1000 ECE cycles (the first cycle and the 1000th cycle). **b** The heat flux signal of 1% film measured at 80 MV/m for 8000 ECE cycles (the first cycle and the 8000th cycle).


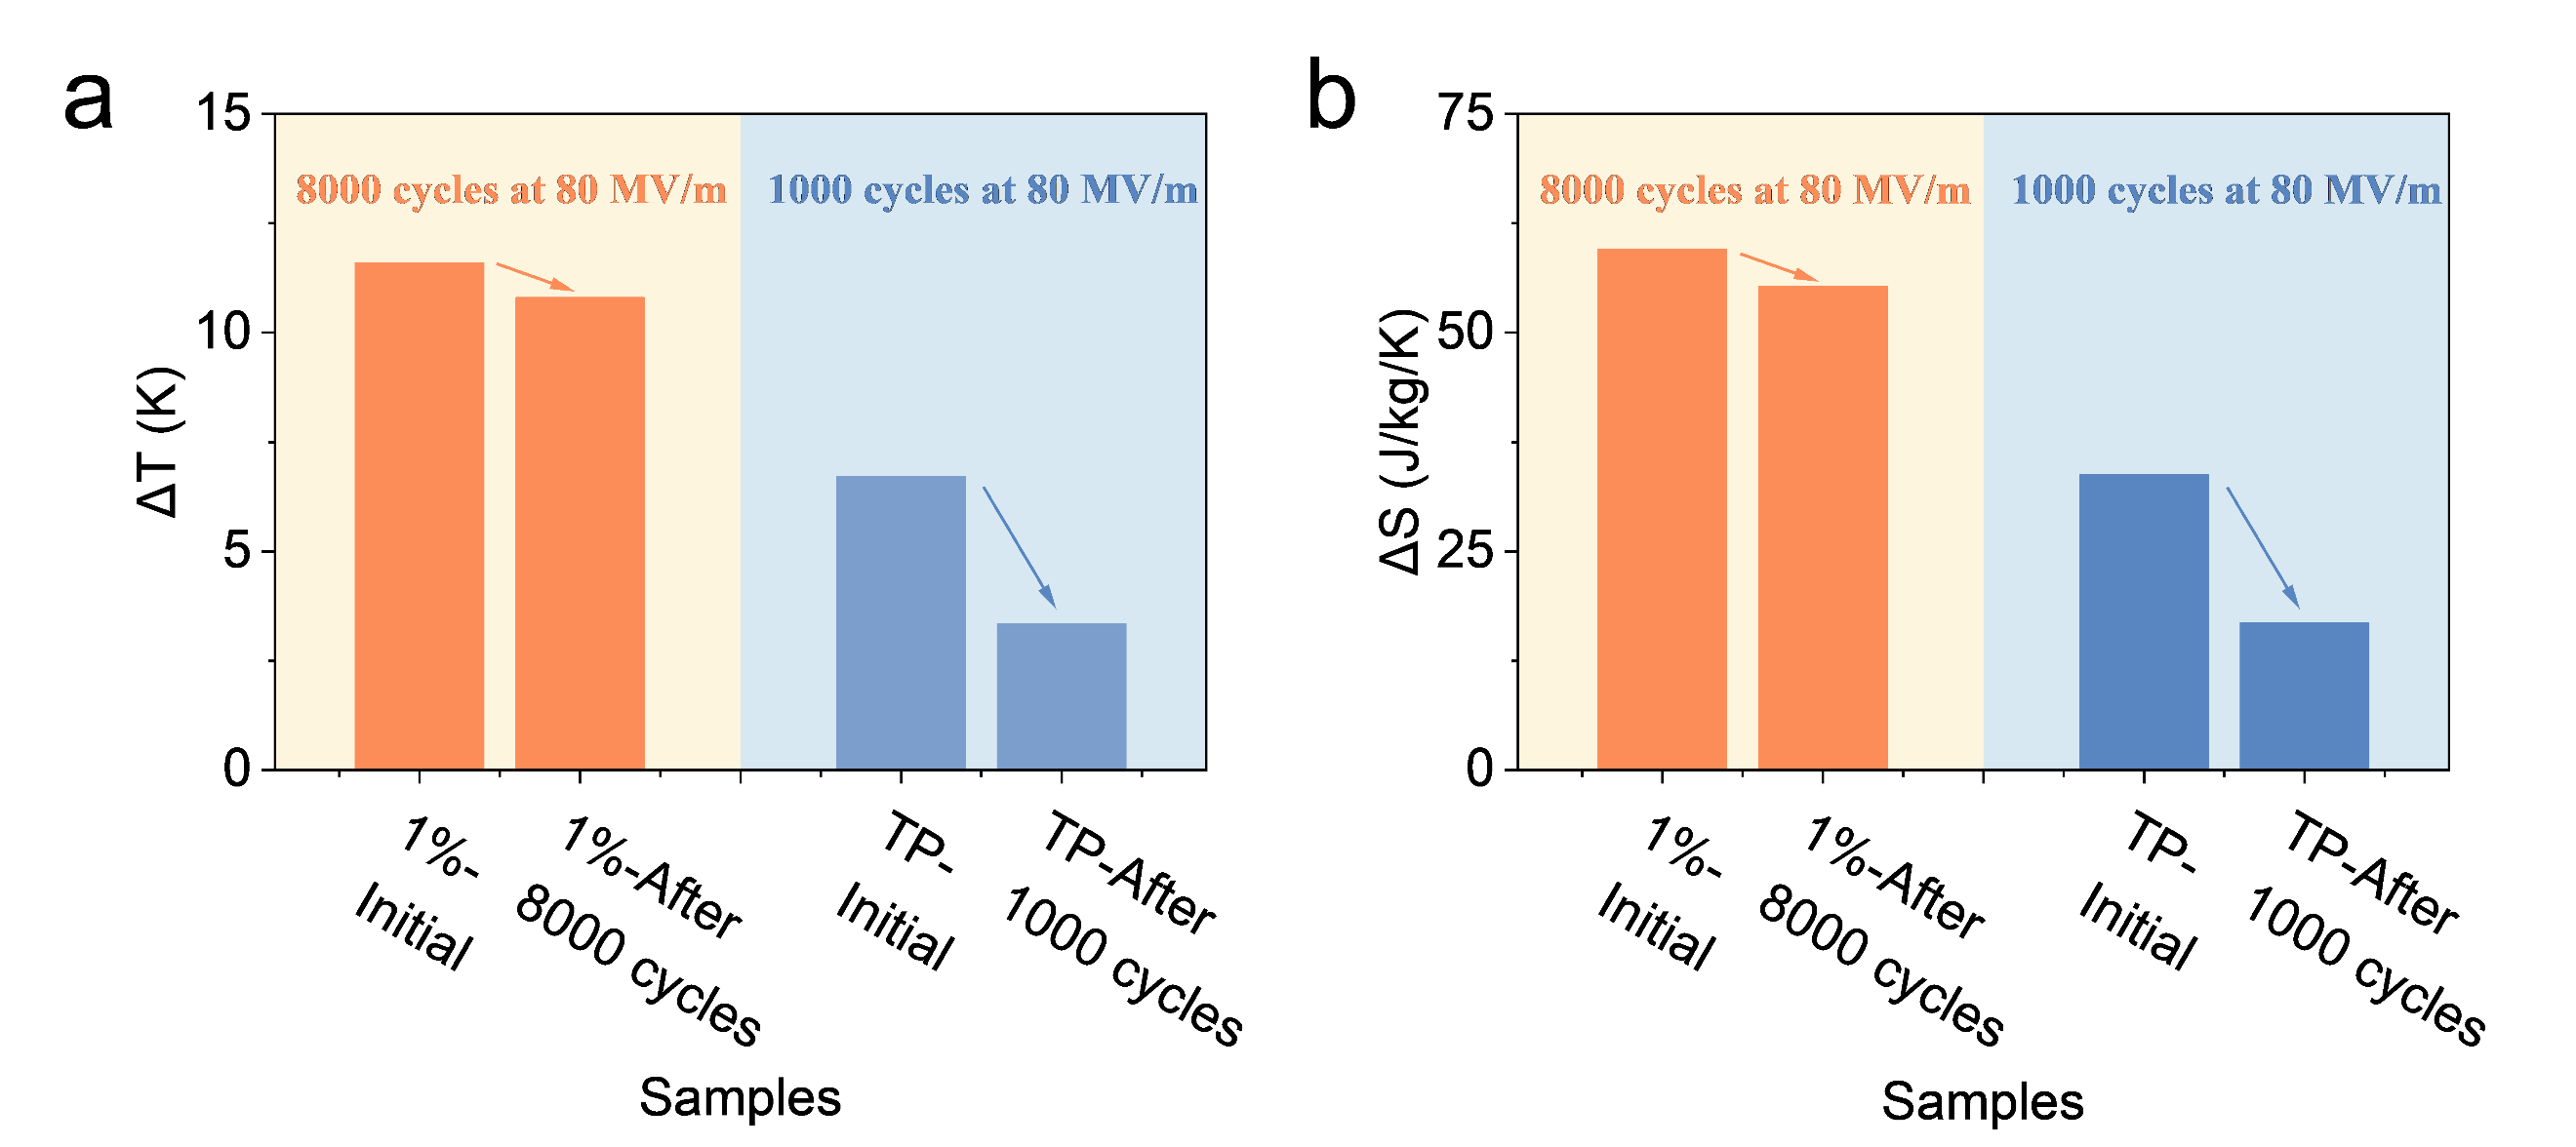


**Figure S13.** **a** ΔT and **b** ΔS of TP film (the first cycle and the 1000th cycle) and 1% film (the first cycle and the 8000th cycle) measured at 80 MV/m.


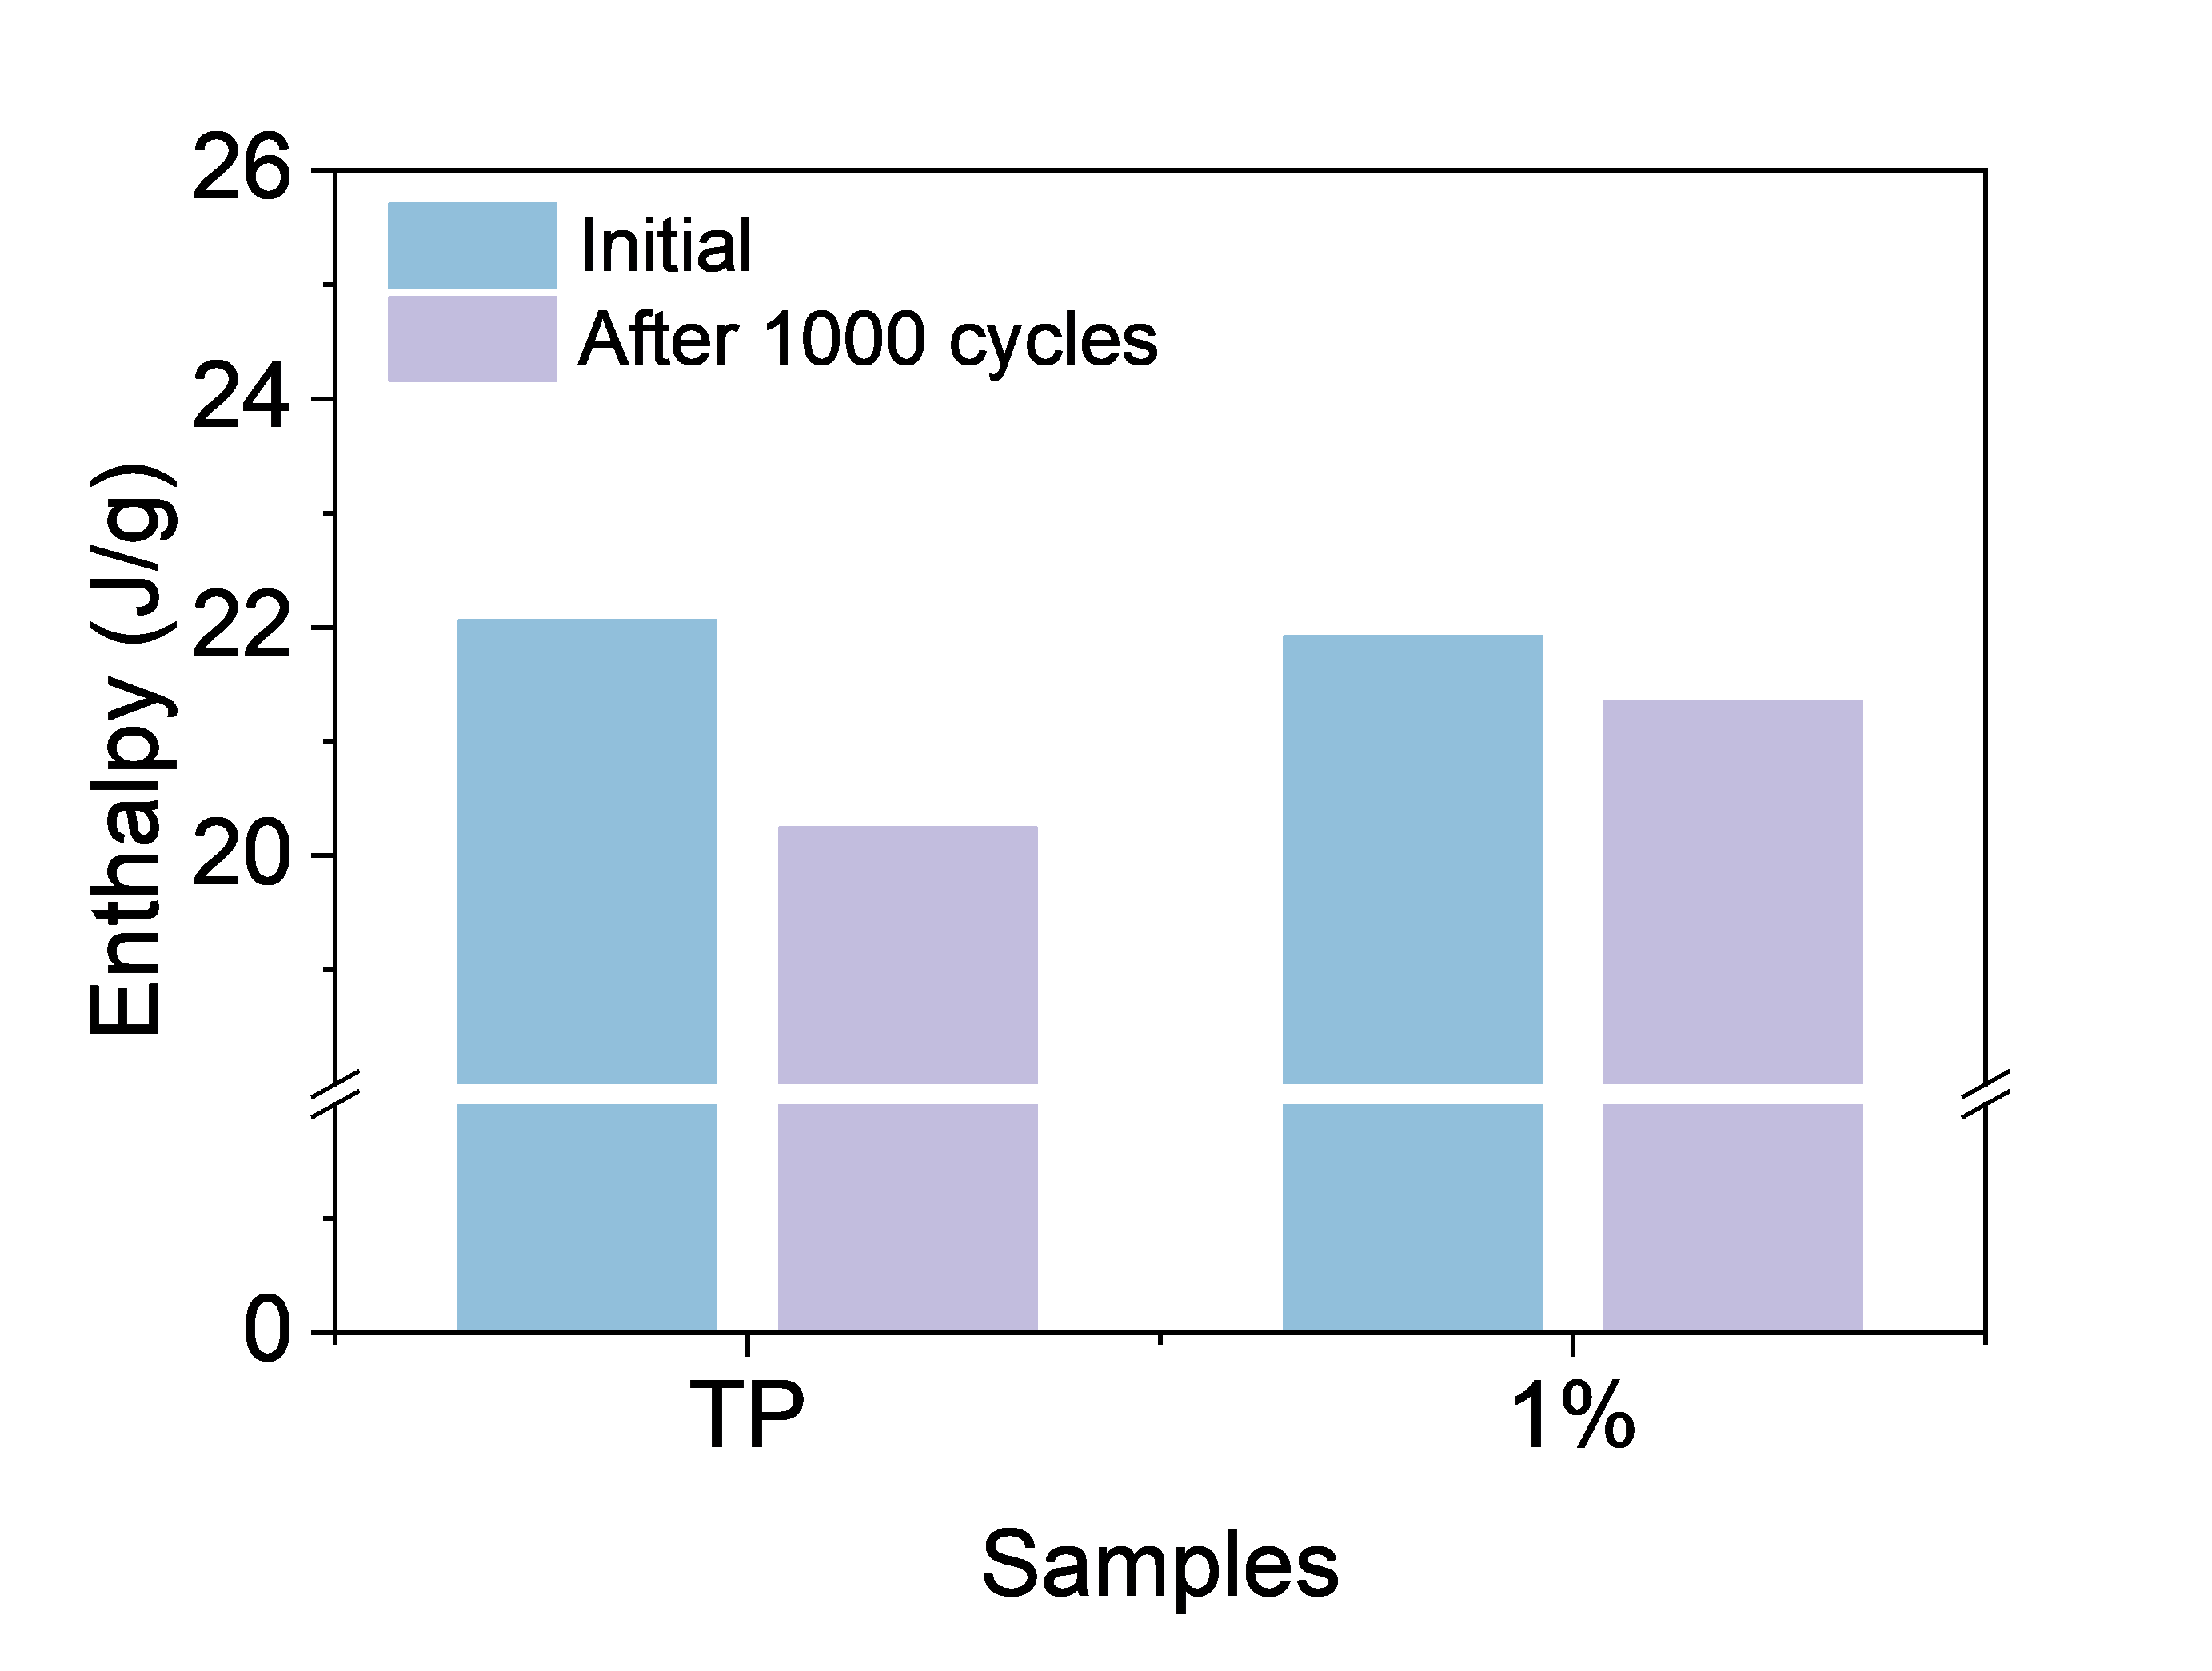


**Figure S14.** The enthalpy changes of TP film and 1% film (initial and after 1000 ECE cycles at 80 MV/m).
